# Supplementary material for: Synthesis of novel profluorescent nitroxides as dual luminescent-paramagnetic active probes
Source: Royal Society of Chemistry journal article supplement (doi:10.1039/c7nj01698k), 2017-01-01

## Supporting Information

for

### Synthesis of novel profluorescent nitroxides as dual luminescent-paramagnetic active probes

Anca G. Coman,<sup>a</sup> Codruta C. Paraschivescu,<sup>a</sup> Anca Paun,<sup>a</sup> Andreea Diac,<sup>b</sup> Niculina D. Hadade,<sup>b</sup> Laurent Jouffret,<sup>c</sup> Arnaud Gautier,<sup>c,\*</sup> Mihaela Matache<sup>a,\*</sup> and Petre Ionita<sup>a,d,\*</sup>

<sup>a</sup>University of Bucharest, Faculty of Chemistry, Department of Organic Chemistry, Biochemistry and Catalysis, Research Centre of Applied Organic Chemistry, 90-92 Panduri Street, RO-050663 Bucharest, Romania; e-mail: mihaela.matache@g.unibuc.ro (M. Matache); pionita@icf.ro (P. Ionita)

<sup>b</sup>Faculty of Chemistry and Chemical Engineering, Supramolecular Organic and Organometallic Chemistry Centre, "Babes-Bolyai" University, 11 Arany Janos Str., RO-400028-Cluj-Napoca, Romania;

<sup>c</sup>Université Clermont Auvergne, CNRS, Sigma Clermont, ICCF, F-63000 Clermont-Ferrand, France; e-mail: arnaud.gautier@uca.fr  
<sup>d</sup>Institute of Physical Chemistry "Ilie Murgulescu", 202 Splaiul Independentei, Bucharest, Romania

#### 1. Electron paramagnetic resonance

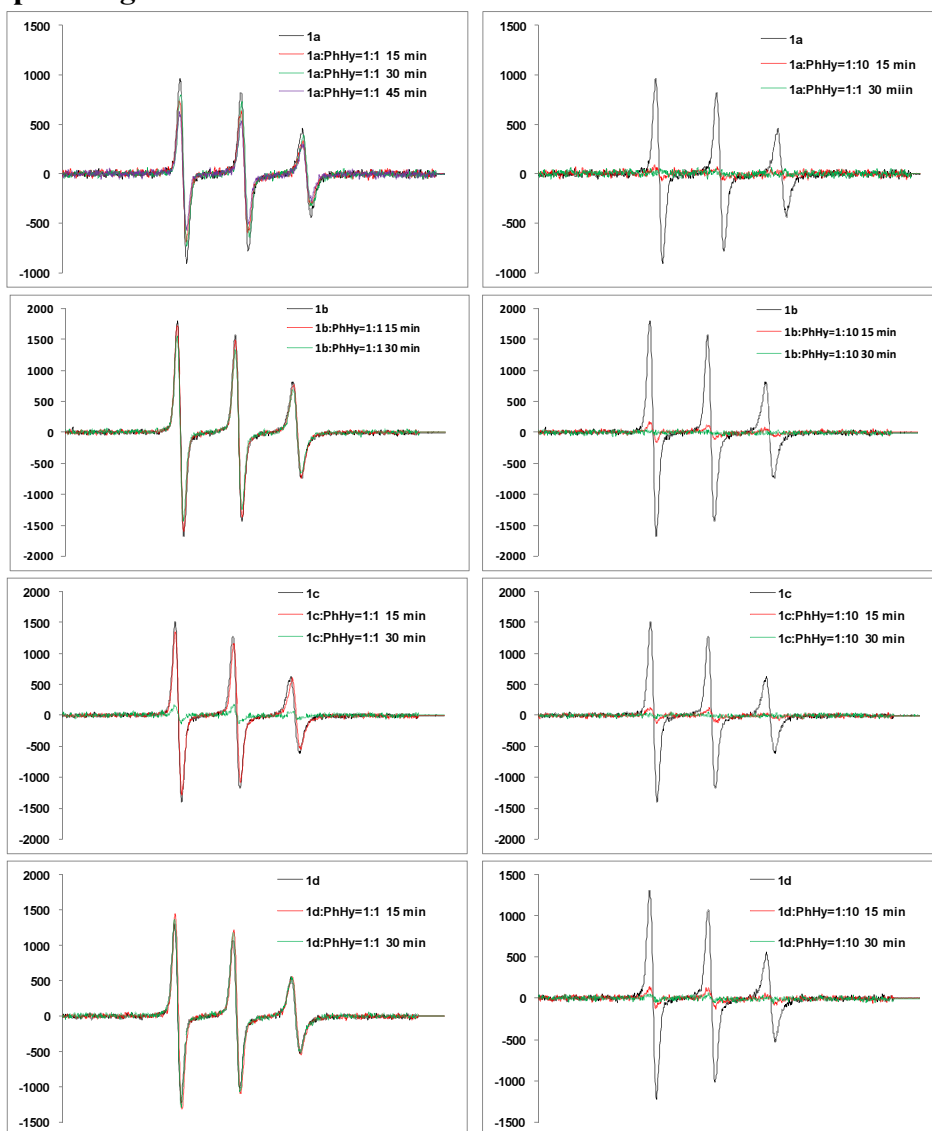

**Figure S1** Left: EPR spectra of compounds **1a-d** after treatment with phenylhydrazine in a 1:1 ratio at different reaction times. Right: EPR spectra of compounds **1a-d** after treatment with phenylhydrazine in a 1:10 ratio at different reaction times. Experiments were conducted in 20% DMSO in HEPES 0,01M pH= 7.5, at a concentration of  $5 \times 10^{-5}$ M

EPR spectra were recorded on a Jeol Jes FA 100 apparatus. Aqueous solutions of free radicals at  $10^{-4}$  M concentration were charged into capillary glass tubes and the spectra were recorded at room temperature. The following settings were used: frequency 8.99 GHz, field 322 mT, sweep width 10 mT, sweep time 120 s, time constant 30 ms, gain 200, modulation frequency 100 kHz, modulation width 0.1 mT.

## 2. Fluorescence spectroscopy

**a) Fluorescence spectra of compounds 5a-d.** Fluorescence spectra were recorded with a Cary Eclipse fluorimeter. The spectra were recorded in 1 cm quartz luminescence cells 5 nm excitation and emission slits were used for all measurements. Absorption spectra for quantum yields determination were recorded with a UV-3100 spectrometer. Stock solutions of compounds were prepared in DMSO at  $10^{-3}$  mol L $^{-1}$  and diluted to  $5 \times 10^{-7}$  mol L $^{-1}$  in HEPES buffer ( $10^{-2}$  mol L $^{-1}$  pH = 7.4). Quantum yields were determined using a solution of quinine sulphate in 0.5 mol L $^{-1}$  aqueous H $_2$ SO $_4$  as standard for quantum yield determination.

**b) Fluorescence spectra of 1a-d and fluorescence spectra of compounds 1a-d incubated with a reducing agent.** Fluorescence spectra were recorded with a Thermo Scientific Varioskan Flash spectral scanning multimode reader. The spectra were recorded in suitable plates using 5 nm excitation and emission slits were used for all measurements. Stock solutions of compounds were prepared in DMSO at  $10^{-3}$  mol L $^{-1}$ , diluted to  $5 \times 10^{-5}$  mol L $^{-1}$  in  $10^{-2}$  mol L $^{-1}$  pH = 7.4 HEPES buffer and incubated for different times, before reading the fluorescence, with a solution of sodium ascorbate  $5 \times 10^{-5}$  mol L $^{-1}$  in HEPES buffer ( $10^{-2}$  mol L $^{-1}$  pH = 7.4).

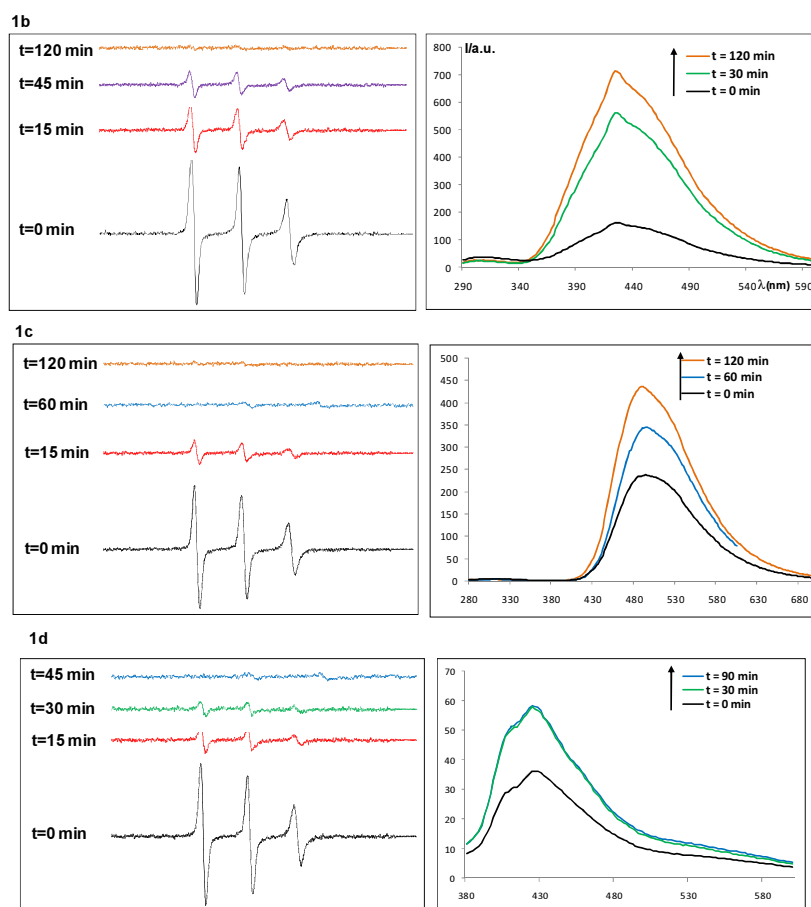

**Figure S2** Left: EPR spectra of compounds **1b-d** after treatment with sodium ascorbate. Right: Emission spectra of compounds **1b-d** after treatment with sodium ascorbate. Experiments were conducted in 20% DMSO in HEPES 0,01M pH= 7.5, at a concentration of  $5 \times 10^{-5}$ M

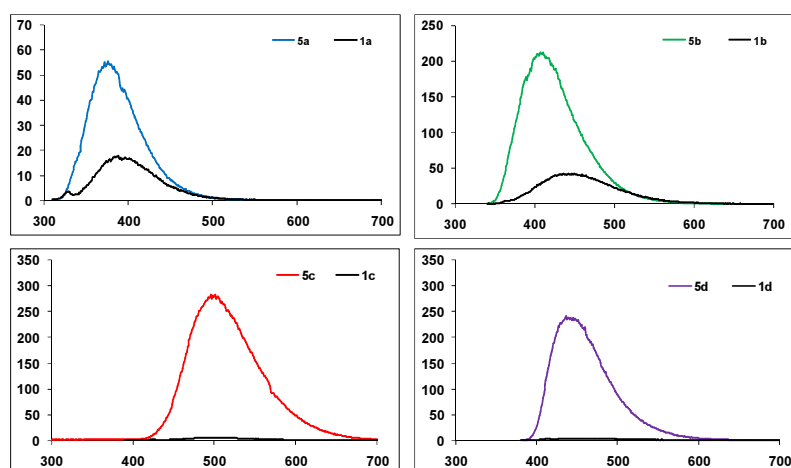

**Figure S3** Solution emission spectra of the nitroxides **1a-d** (black lines) compared to their precursor carboxy derivatives **5a-d** (coloured lines) recorded in 15% DMSO in HEPES 0.01 M pH= 7.51, at a concentration of  $5 \times 10^{-7}$  M, using  $\lambda_{\text{ex}}=296$  nm for **1a**,  $\lambda_{\text{ex}}=319$  nm for **1b**,  $\lambda_{\text{ex}}=372$  nm for **1c**,  $\lambda_{\text{ex}}=370$  nm for **1d**

**c) Response of 1a to sodium ascorbate.** Fluorescence spectra were recorded with a Thermo Scientific Varioskan Flash spectral scanning multimode reader. The spectra were recorded in suitable plates using 5 nm excitation and emission slits were used for all measurements. Stock solution of compound was prepared in DMSO at  $10^{-3}$  mol L<sup>-1</sup> and aliquots of 50  $\mu$ L were incubated for 30 and 45 minutes, respectively, before reading, with solutions of sodium ascorbate  $10^{-3}$  mol L<sup>-1</sup> in HEPES buffer ( $10^{-2}$  mol L<sup>-1</sup> pH = 7.4) in ratios from 0 to 2 (8 points) to a final volume of 1 mL with  $5 \times 10^{-5}$  mol L<sup>-1</sup> final concentration of the organic compound.

**d) Fluorescence spectra of compound 1d in various solvents and of compound 1d in various solvents incubated with a reducing agent.** Fluorescence spectra were recorded with a Thermo Scientific Varioskan Flash spectral scanning multimode reader. The spectra were recorded in suitable plates using 5 nm excitation and emission slits were used for all measurements.. Absorption spectra for quantum yields determination were recorded with a Jasco V-630 spectrophotometer, using 10 mm quartz cell. Stock solutions of compound were prepared in CHCl<sub>3</sub> ( $2.68 \times 10^{-3}$  mol L<sup>-1</sup>), CH<sub>3</sub>CN ( $2 \times 10^{-4}$  mol L<sup>-1</sup>), CH<sub>3</sub>OH ( $2 \times 10^{-3}$  mol L<sup>-1</sup>), DMSO ( $10^{-4}$  mol L<sup>-1</sup>), diluted to  $5 \times 10^{-5}$  mol L<sup>-1</sup> using the corresponding solvent and incubated for 30 minutes, before reading the absorbance, with a solution of phenylhydrazine  $10^{-1}$  mol L<sup>-1</sup> in the corresponding solvent, in a ratio **1d**:phenylhydrazine=1:10. Quantum yields were determined using a solution of quinine sulphate in 0.5 mol L<sup>-1</sup> aqueous H<sub>2</sub>SO<sub>4</sub> as standard for quantum yield determination.

**e) The solid state emission spectra** were recorded on a JASCO FP 8300 spectrofluorometer.

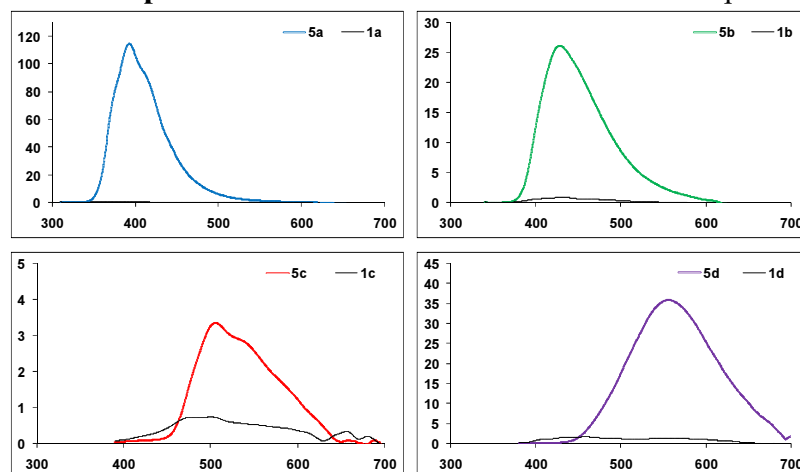

**Figure S4** Solid state emission spectra of the nitroxides **1a-d** (black lines) and their precursor carboxy derivatives **5a-d** (coloured lines) recorded using  $\lambda_{\text{ex}}=295$  nm for **1a**,  $\lambda_{\text{ex}}=318$  nm for **1b**,  $\lambda_{\text{ex}}=370$  nm for **1c**,  $\lambda_{\text{ex}}=360$  nm for **1d**.

### 3. Cyclic voltammetry

Cyclic voltammetry was performed in dichloromethane solution using tetrabutylammonium hexafluorophosphate 0.10M as supporting electrolyte. All solutions were deaerated by bubbling with a dry argon stream prior to each experiment. Experiments were carried out in a one-compartment cell equipped with platinum electrodes and saturated calomel reference electrode (SCE) with a Biologic SP-150 potentiostat with positive feedback compensation.

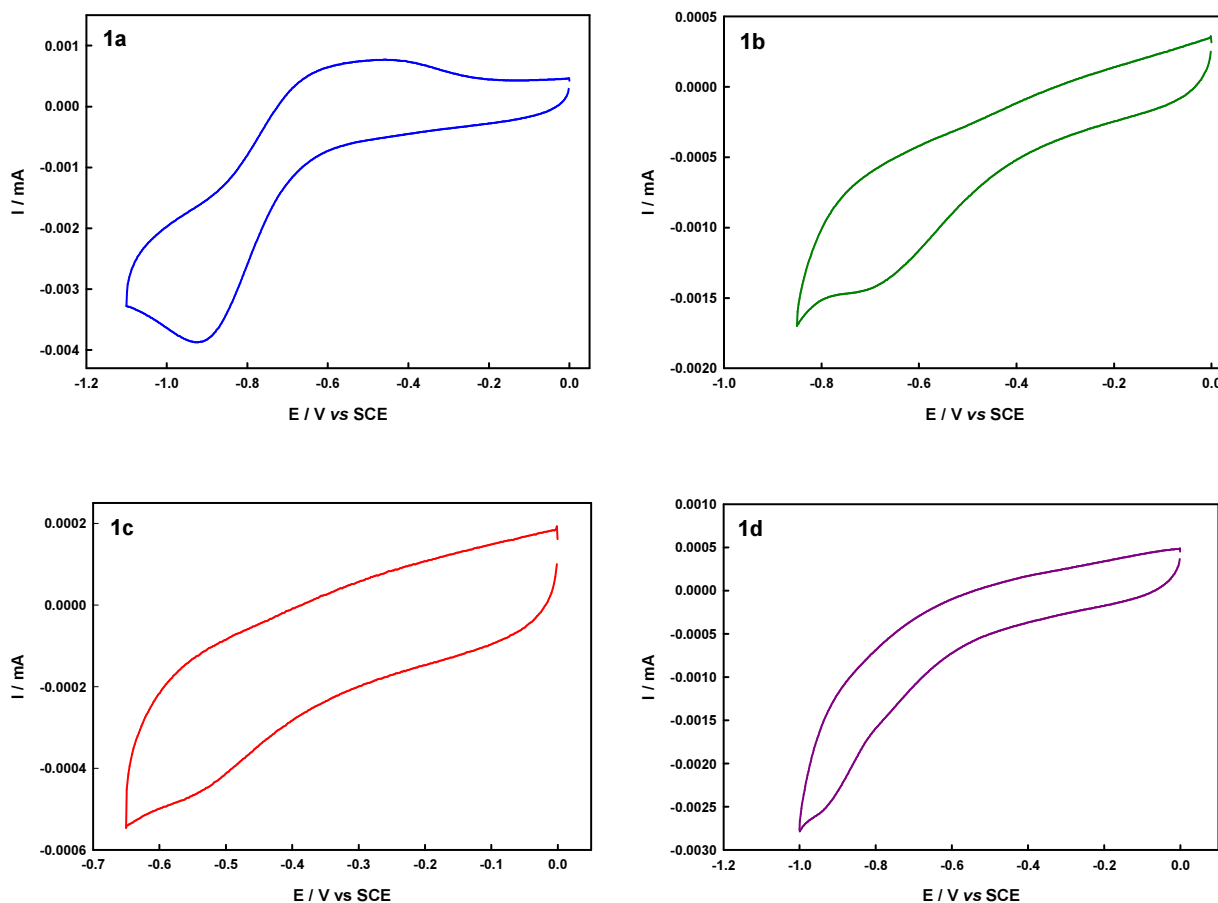

**Figure S5.** Cyclic voltammograms of compounds **1** in 0.1 M  $\text{Bu}_4\text{NPF}_6/\text{CH}_2\text{Cl}_2$ , Pt electrodes, scan rate =  $100 \text{ mV s}^{-1}$ .

4.  $^1\text{H}$  NMR spectra (selection - reduced with  $\text{PhNHNH}_2$ ) of compound **1d** in  $\text{CDCl}_3$  and  $\text{DMSO}-d_6$

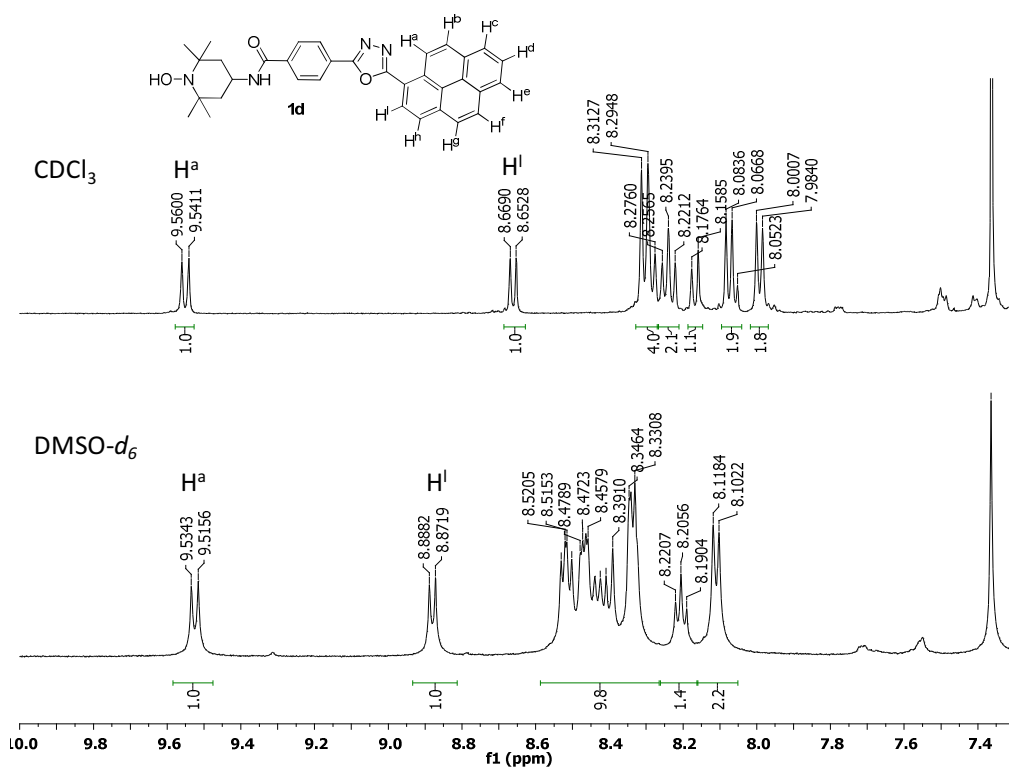

Figure S6 Fragments of the NMR spectra of compound **1d** (reduced with phenylhydrazine) in  $\text{CDCl}_3$  and  $\text{DMSO}-d_6$

5. Single crystal X-Ray Diffraction - the elementary cell of compound **1d** containing two molecules head to tail oriented

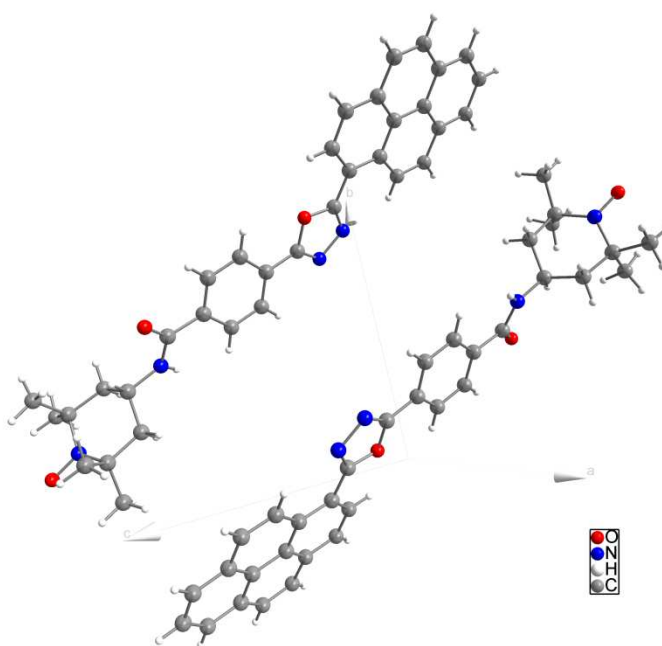

**Table S1. Sample and crystal data for 1d**

|                               |                                                               |                 |
|-------------------------------|---------------------------------------------------------------|-----------------|
| <b>Identification code</b>    | CA104                                                         |                 |
| <b>Chemical formula</b>       | C <sub>34</sub> H <sub>31</sub> N <sub>4</sub> O <sub>3</sub> |                 |
| <b>Formula weight</b>         | 543.63 g/mol                                                  |                 |
| <b>Temperature</b>            | 293(2) K                                                      |                 |
| <b>Wavelength</b>             | 0.71073 Å                                                     |                 |
| <b>Crystal size</b>           | 0.092 x 0.125 x 0.354 mm                                      |                 |
| <b>Crystal system</b>         | triclinic                                                     |                 |
| <b>Space group</b>            | P -1                                                          |                 |
| <b>Unit cell dimensions</b>   | a = 7.990(3) Å                                                | α = 94.821(10)° |
|                               | b = 12.475(4) Å                                               | β = 94.404(9)°  |
|                               | c = 14.539(5) Å                                               | γ = 108.372(9)° |
| <b>Volume</b>                 | 1362.3(8) Å <sup>3</sup>                                      |                 |
| <b>Z</b>                      | 2                                                             |                 |
| <b>Density (calculated)</b>   | 1.325 g/cm <sup>3</sup>                                       |                 |
| <b>Absorption coefficient</b> | 0.086 mm <sup>-1</sup>                                        |                 |
| <b>F(000)</b>                 | 574                                                           |                 |

**Table S2. Data collection and structure refinement for 1d**

|                                            |                                                                                                                                                               |                              |
|--------------------------------------------|---------------------------------------------------------------------------------------------------------------------------------------------------------------|------------------------------|
| <b>Theta range for data collection</b>     | 2.70 to 25.87°                                                                                                                                                |                              |
| <b>Index ranges</b>                        | -9<=h<=9, -15<=k<=15, -17<=l<=17                                                                                                                              |                              |
| <b>Reflections collected</b>               | 43403                                                                                                                                                         |                              |
| <b>Independent reflections</b>             | 5258 [R(int) = 0.0668]                                                                                                                                        |                              |
| <b>Coverage of independent reflections</b> | 99.6%                                                                                                                                                         |                              |
| <b>Absorption correction</b>               | Numerical Mu From Formula                                                                                                                                     |                              |
| <b>Max. and min. transmission</b>          | 0.9920 and 0.9700                                                                                                                                             |                              |
| <b>Refinement method</b>                   | Full-matrix least-squares on F <sup>2</sup>                                                                                                                   |                              |
| <b>Refinement program</b>                  | SHELXL-2014/7 (Sheldrick, 2014)                                                                                                                               |                              |
| <b>Function minimized</b>                  | Σ w(F <sub>o</sub> <sup>2</sup> - F <sub>c</sub> <sup>2</sup> ) <sup>2</sup>                                                                                  |                              |
| <b>Data / restraints / parameters</b>      | 5258 / 0 / 374                                                                                                                                                |                              |
| <b>Goodness-of-fit on F<sup>2</sup></b>    | 1.057                                                                                                                                                         |                              |
| <b>Final R indices</b>                     | 3530 data;<br>I>2σ(I)                                                                                                                                         | R1 = 0.0452, wR2 =<br>0.1194 |
|                                            | all data                                                                                                                                                      | R1 = 0.0810, wR2 =<br>0.1385 |
| <b>Weightingscheme</b>                     | w=1/[σ <sup>2</sup> (F <sub>o</sub> <sup>2</sup> )+(0.0711P) <sup>2</sup> +0.1369P]<br>where P=(F <sub>o</sub> <sup>2</sup> +2F <sub>c</sub> <sup>2</sup> )/3 |                              |
| <b>Largest diff. peak and hole</b>         | 0.383 and -0.253 eÅ <sup>-3</sup>                                                                                                                             |                              |
| <b>R.M.S. deviation from mean</b>          | 0.056 eÅ <sup>-3</sup>                                                                                                                                        |                              |

Figure S 7 <sup>1</sup>H NMR spectrum of compound 4a

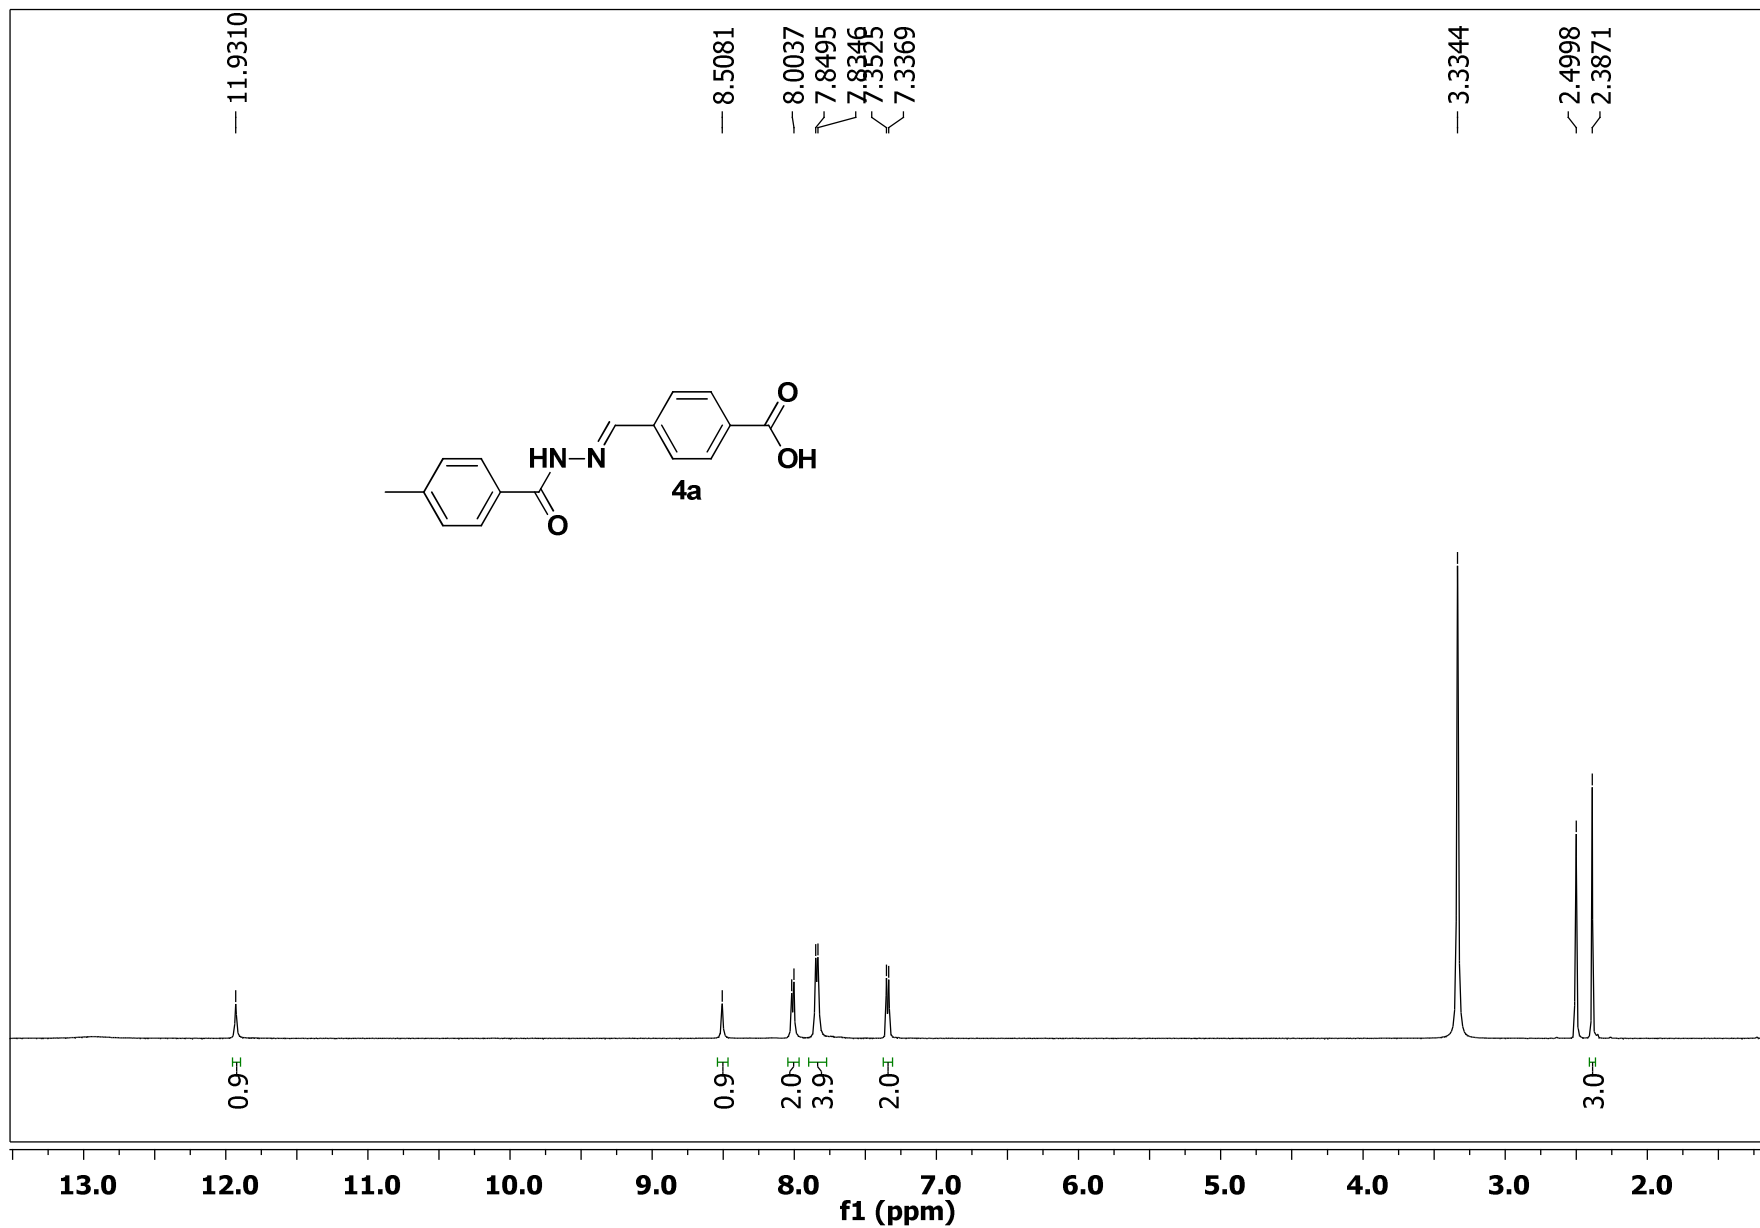

Figure S 8  $^{13}\text{C}$  NMR spectrum of compound 4a

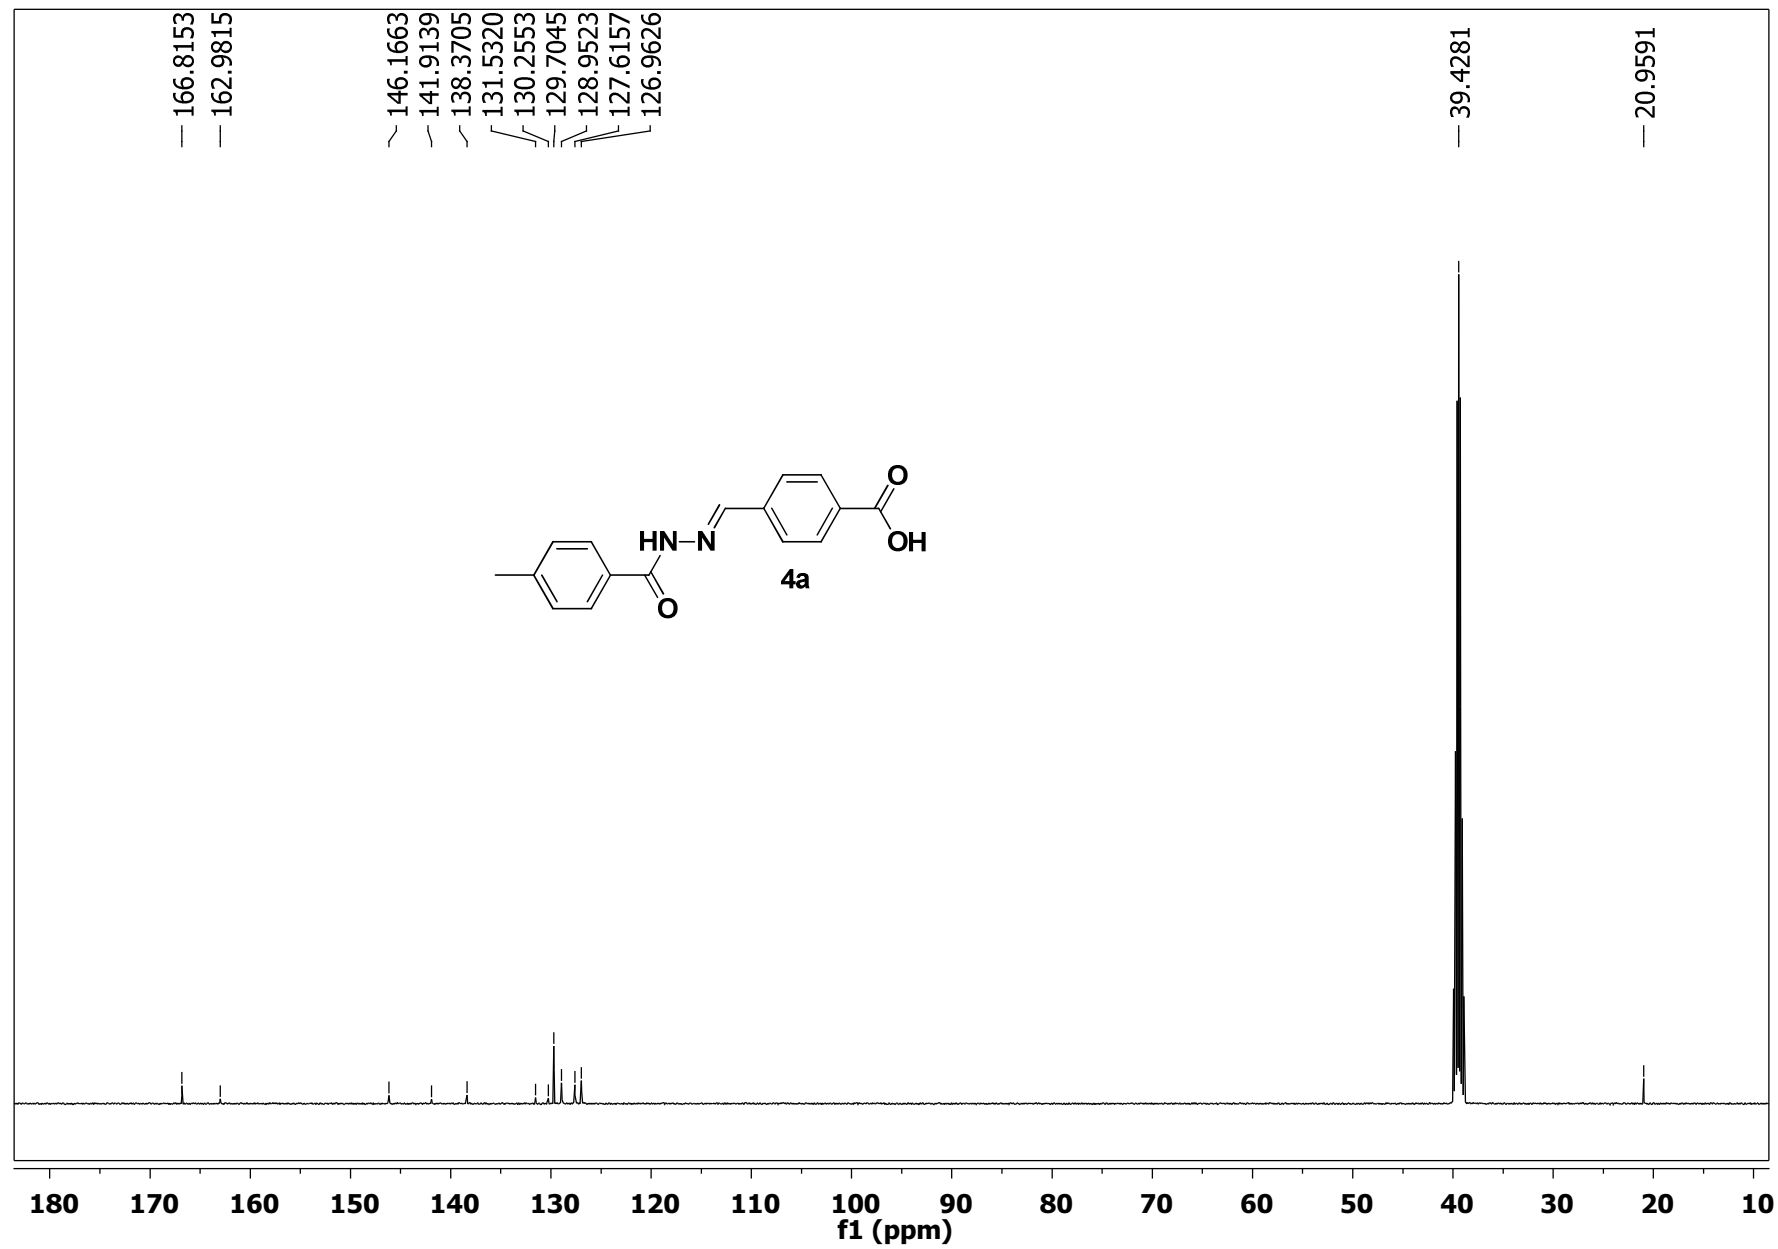



Figure S 9 <sup>1</sup>H NMR spectrum of compound 4b

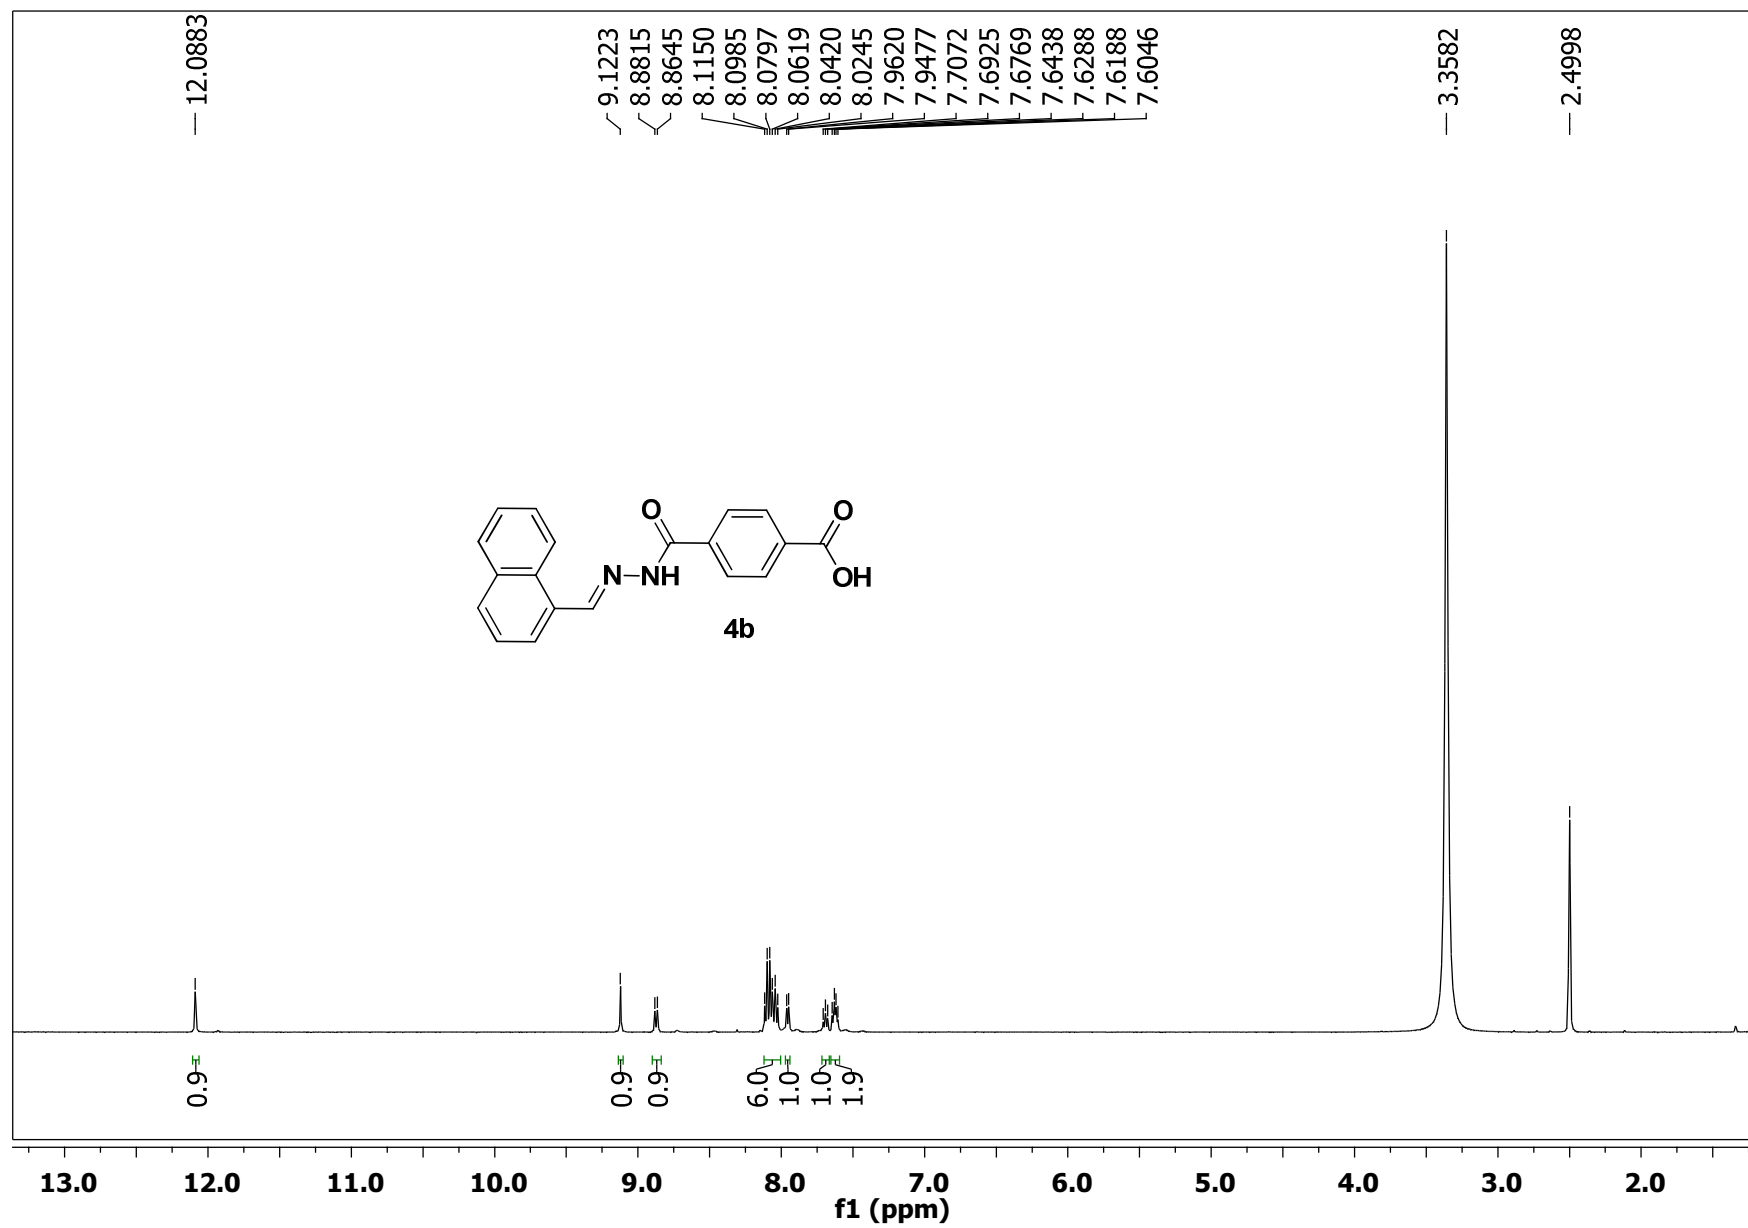

Figure S 10  $^{13}\text{C}$  NMR spectrum of compound 4b

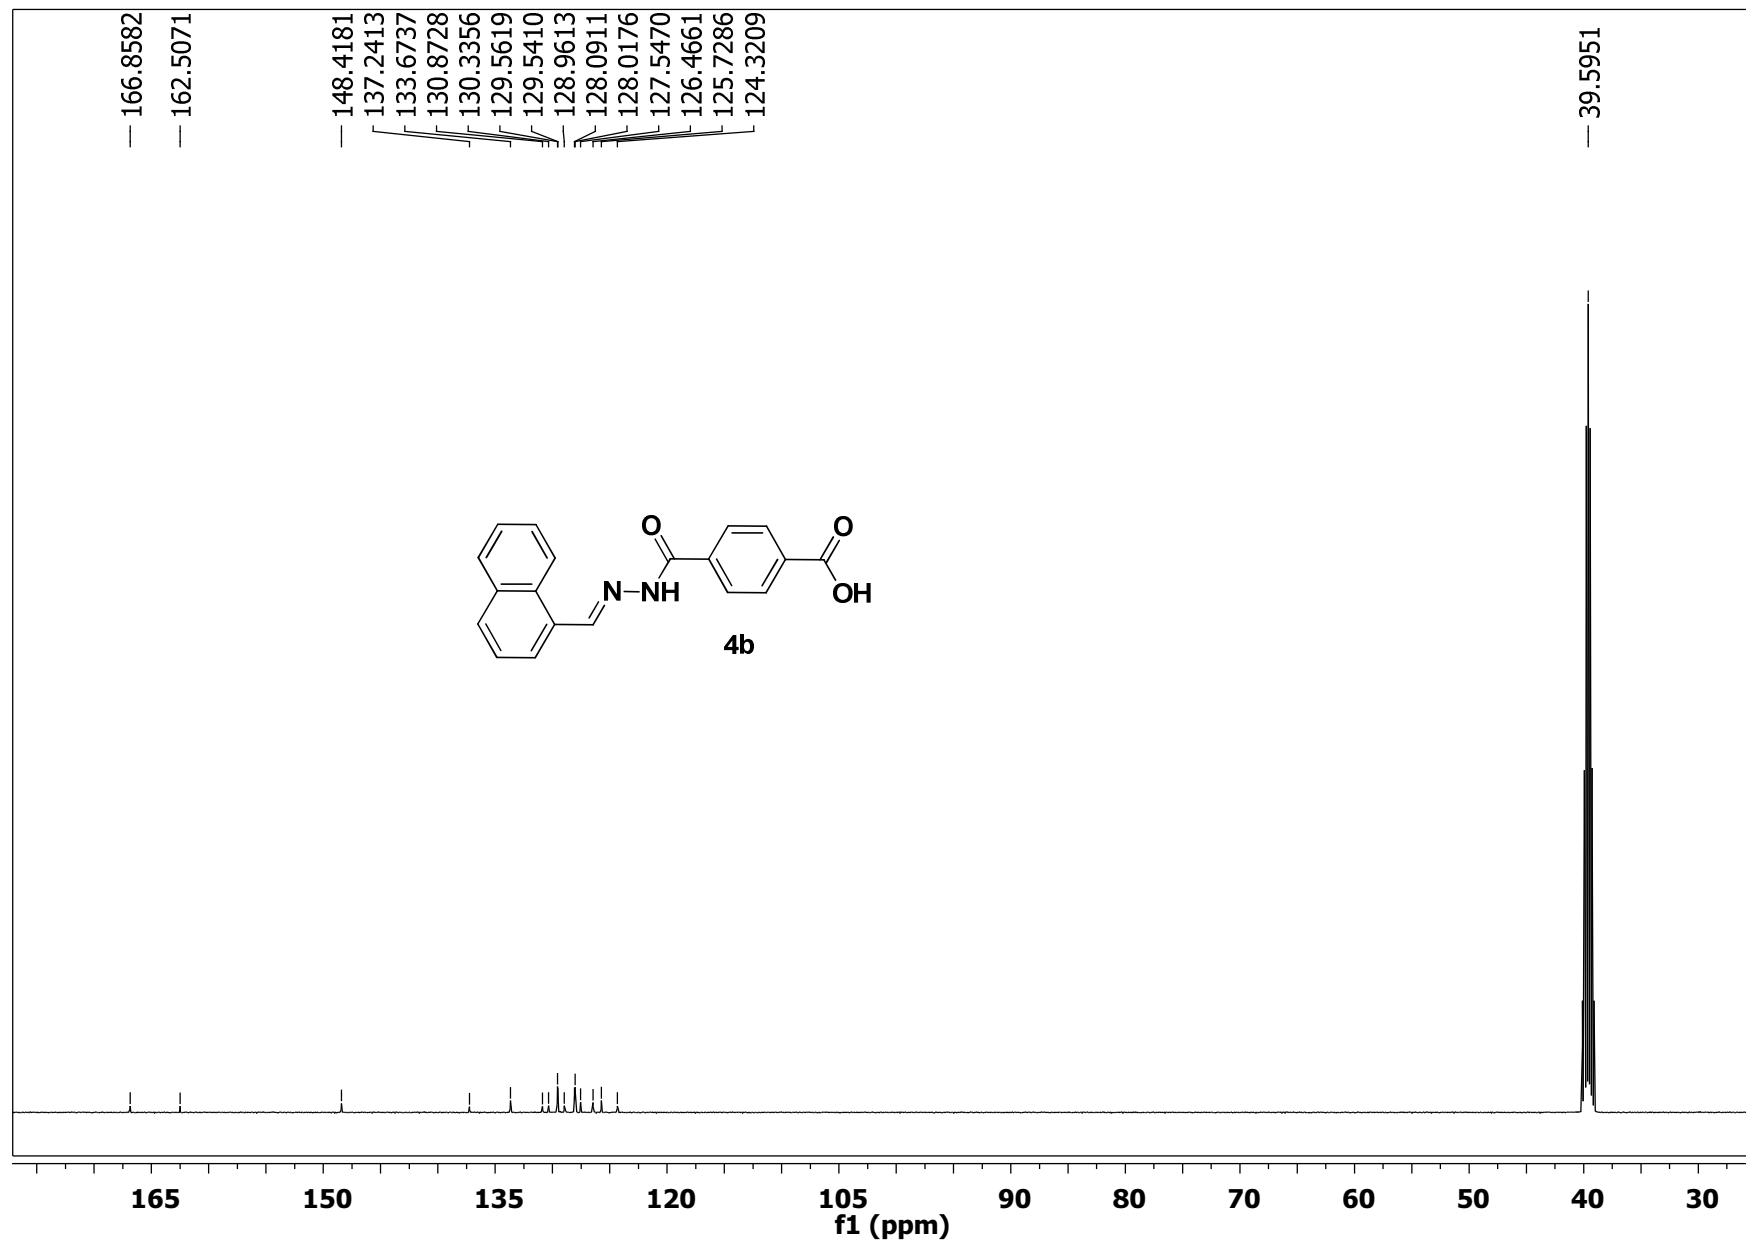

Figure S 11 <sup>1</sup>H NMR spectrum of compound 4c

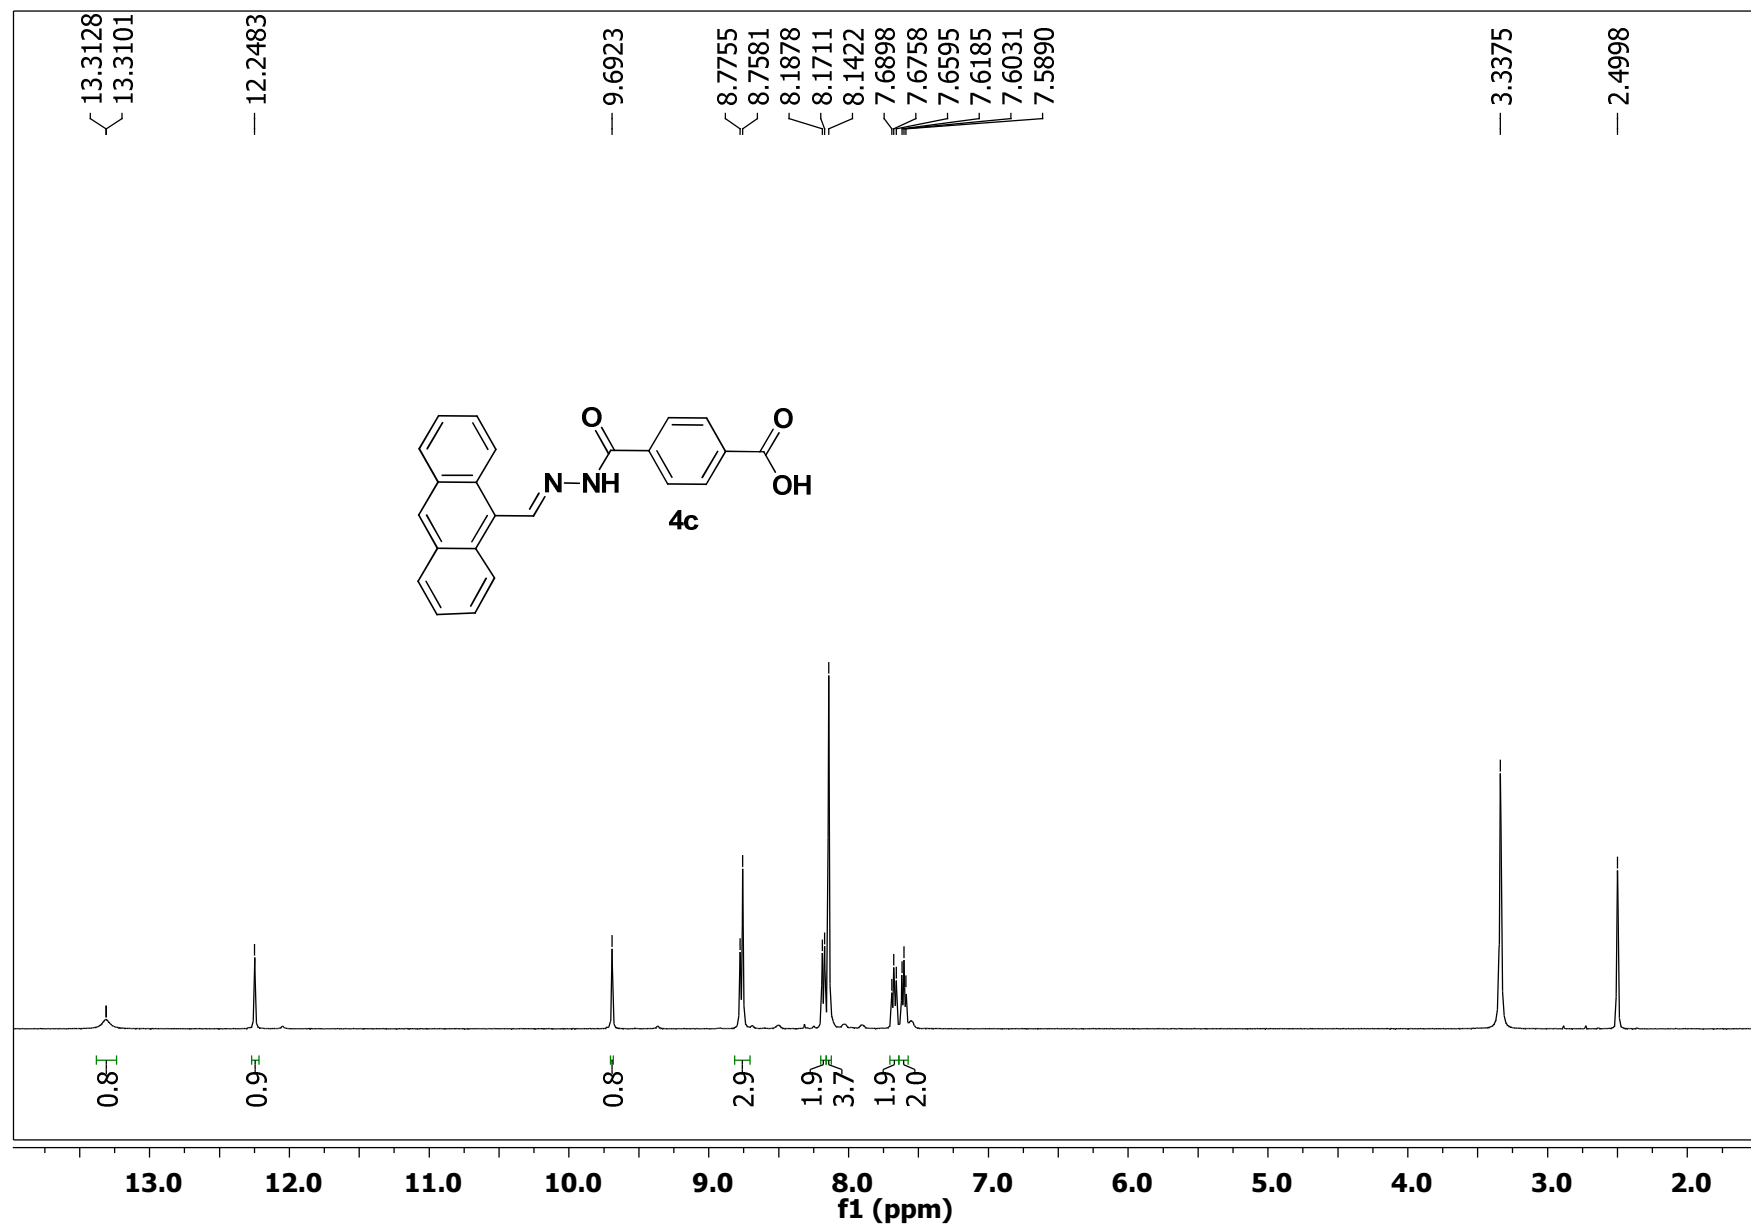

Figure S 12  $^{13}\text{C}$  NMR spectrum of compound 4c

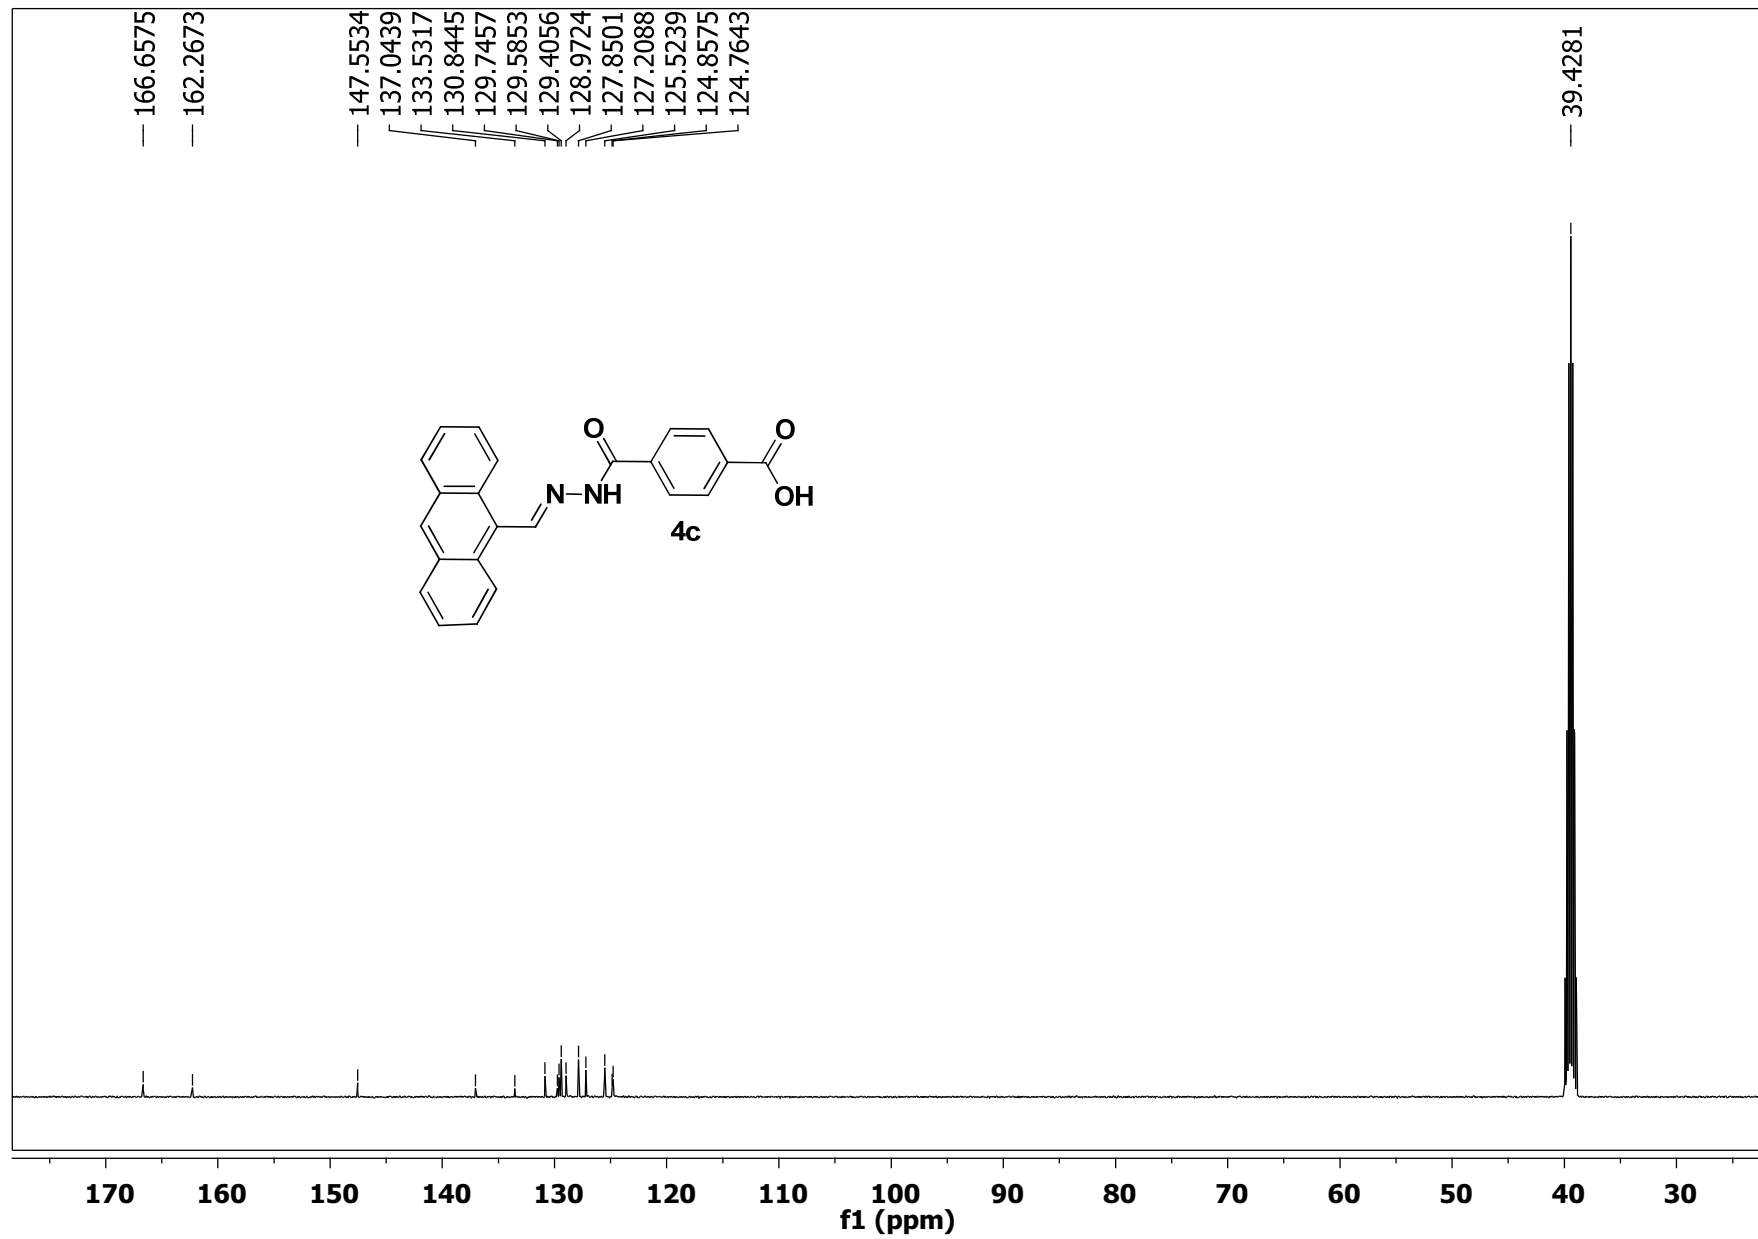

Figure S 13 <sup>1</sup>H NMR spectrum of compound 4d

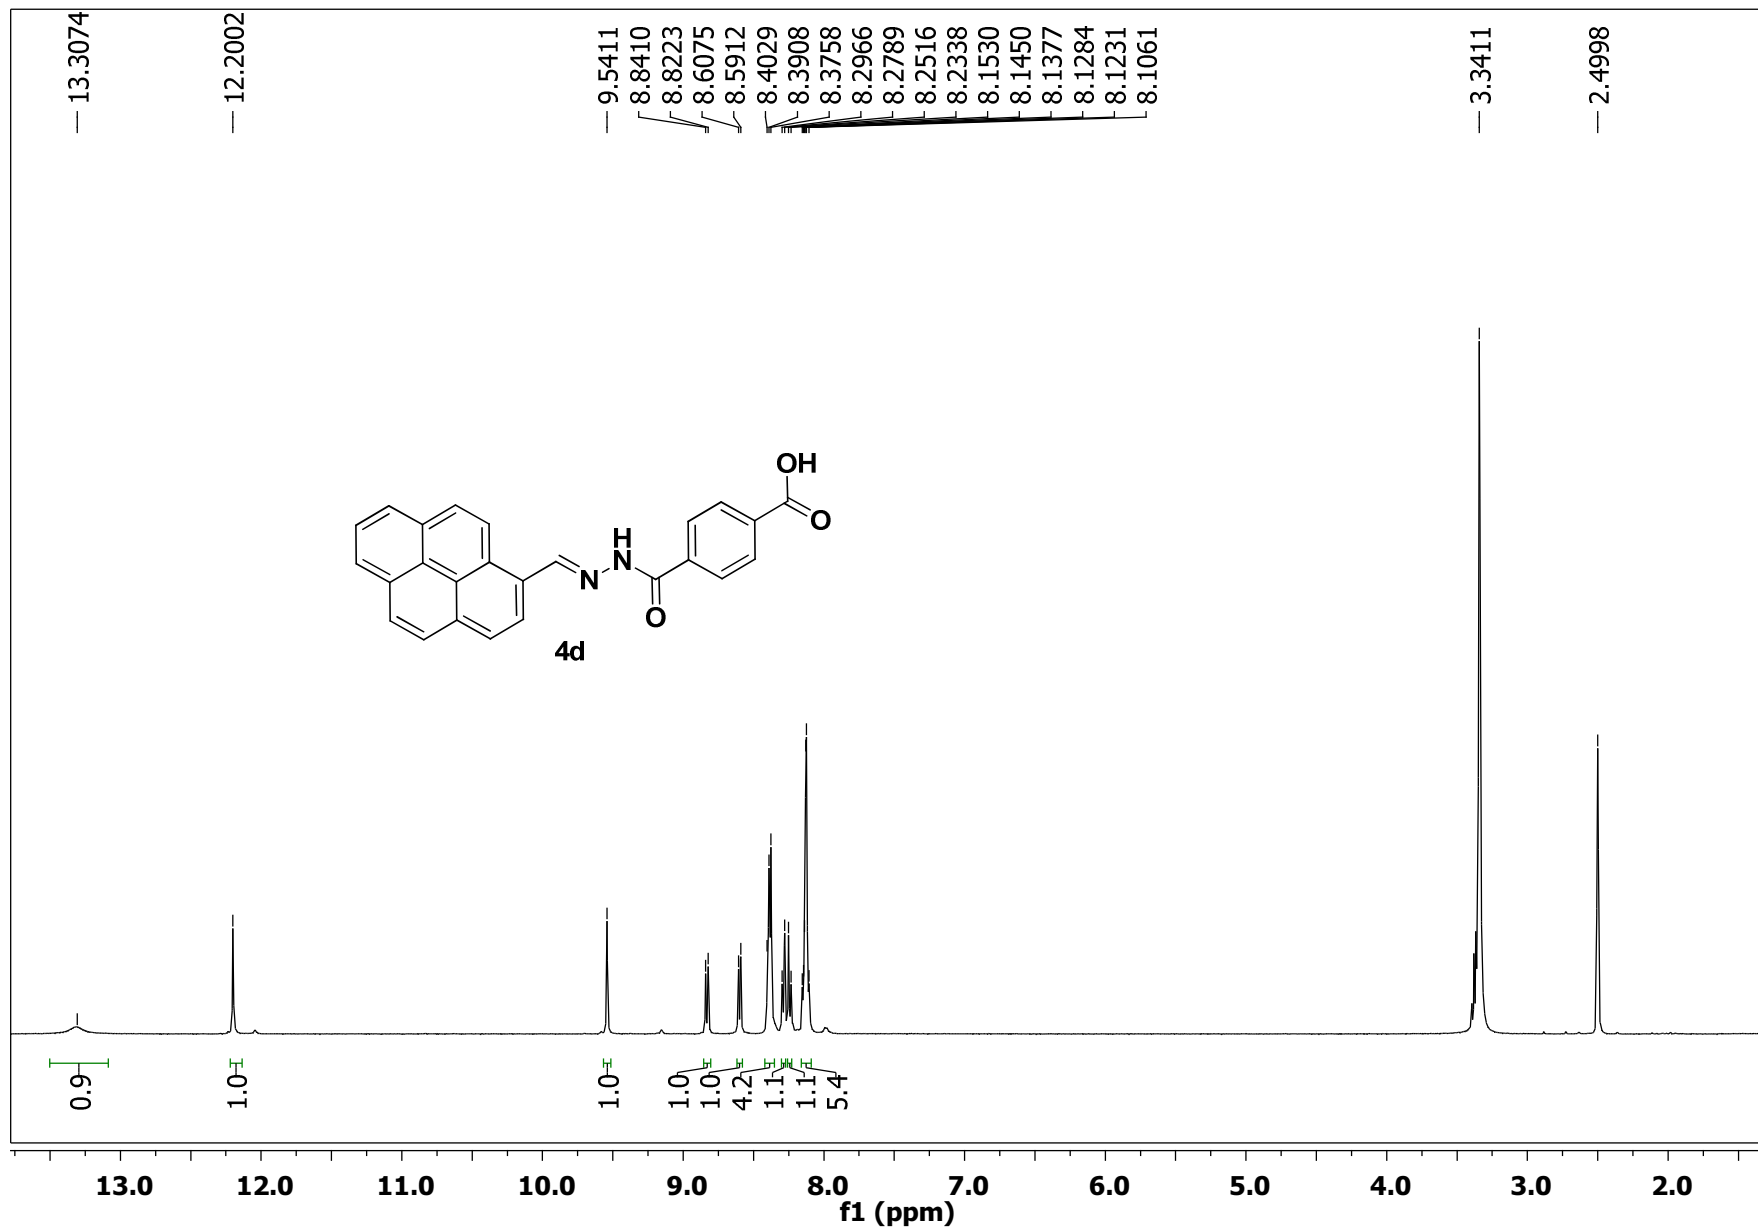

Figure S 14  $^{13}\text{C}$  NMR spectrum of compound 4d

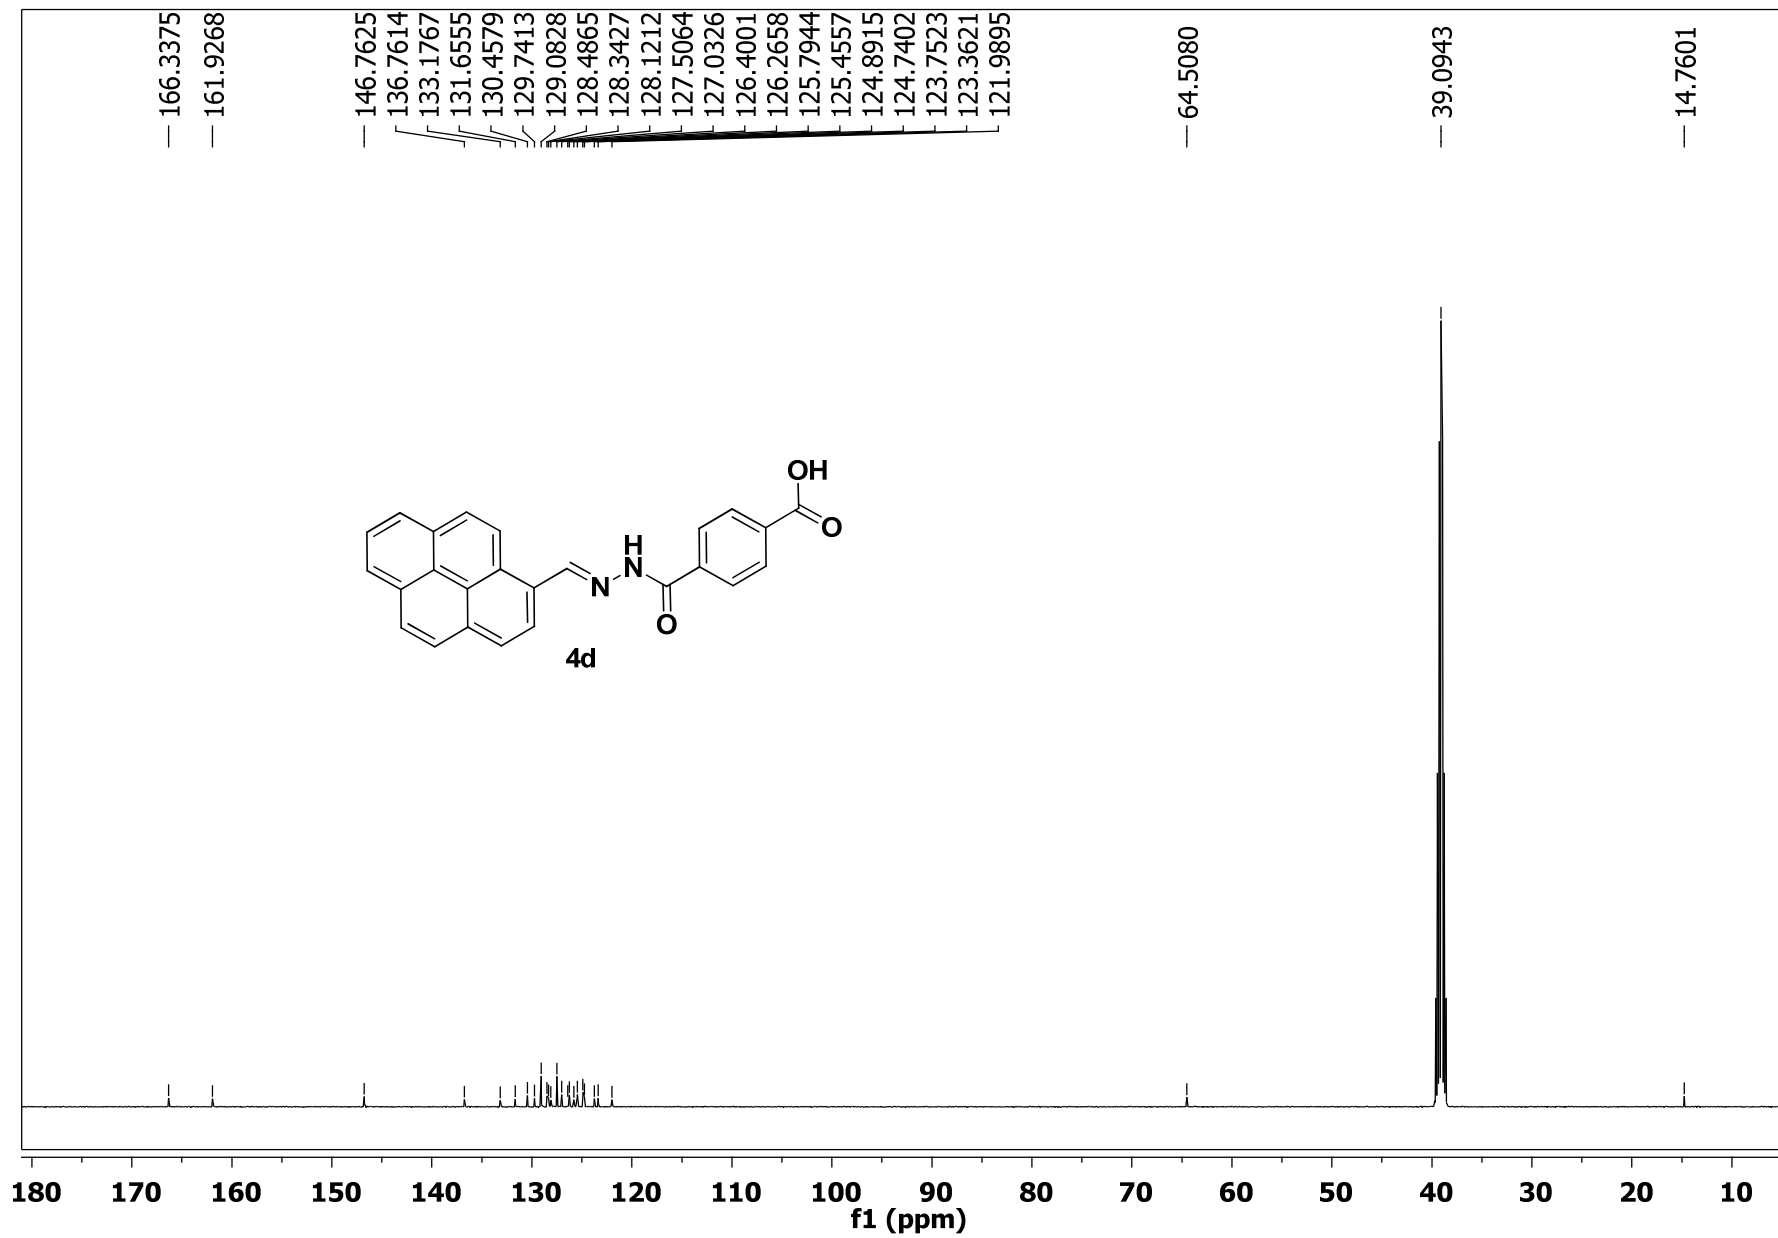

Figure S 15 <sup>1</sup>H NMR spectrum of compound 5a

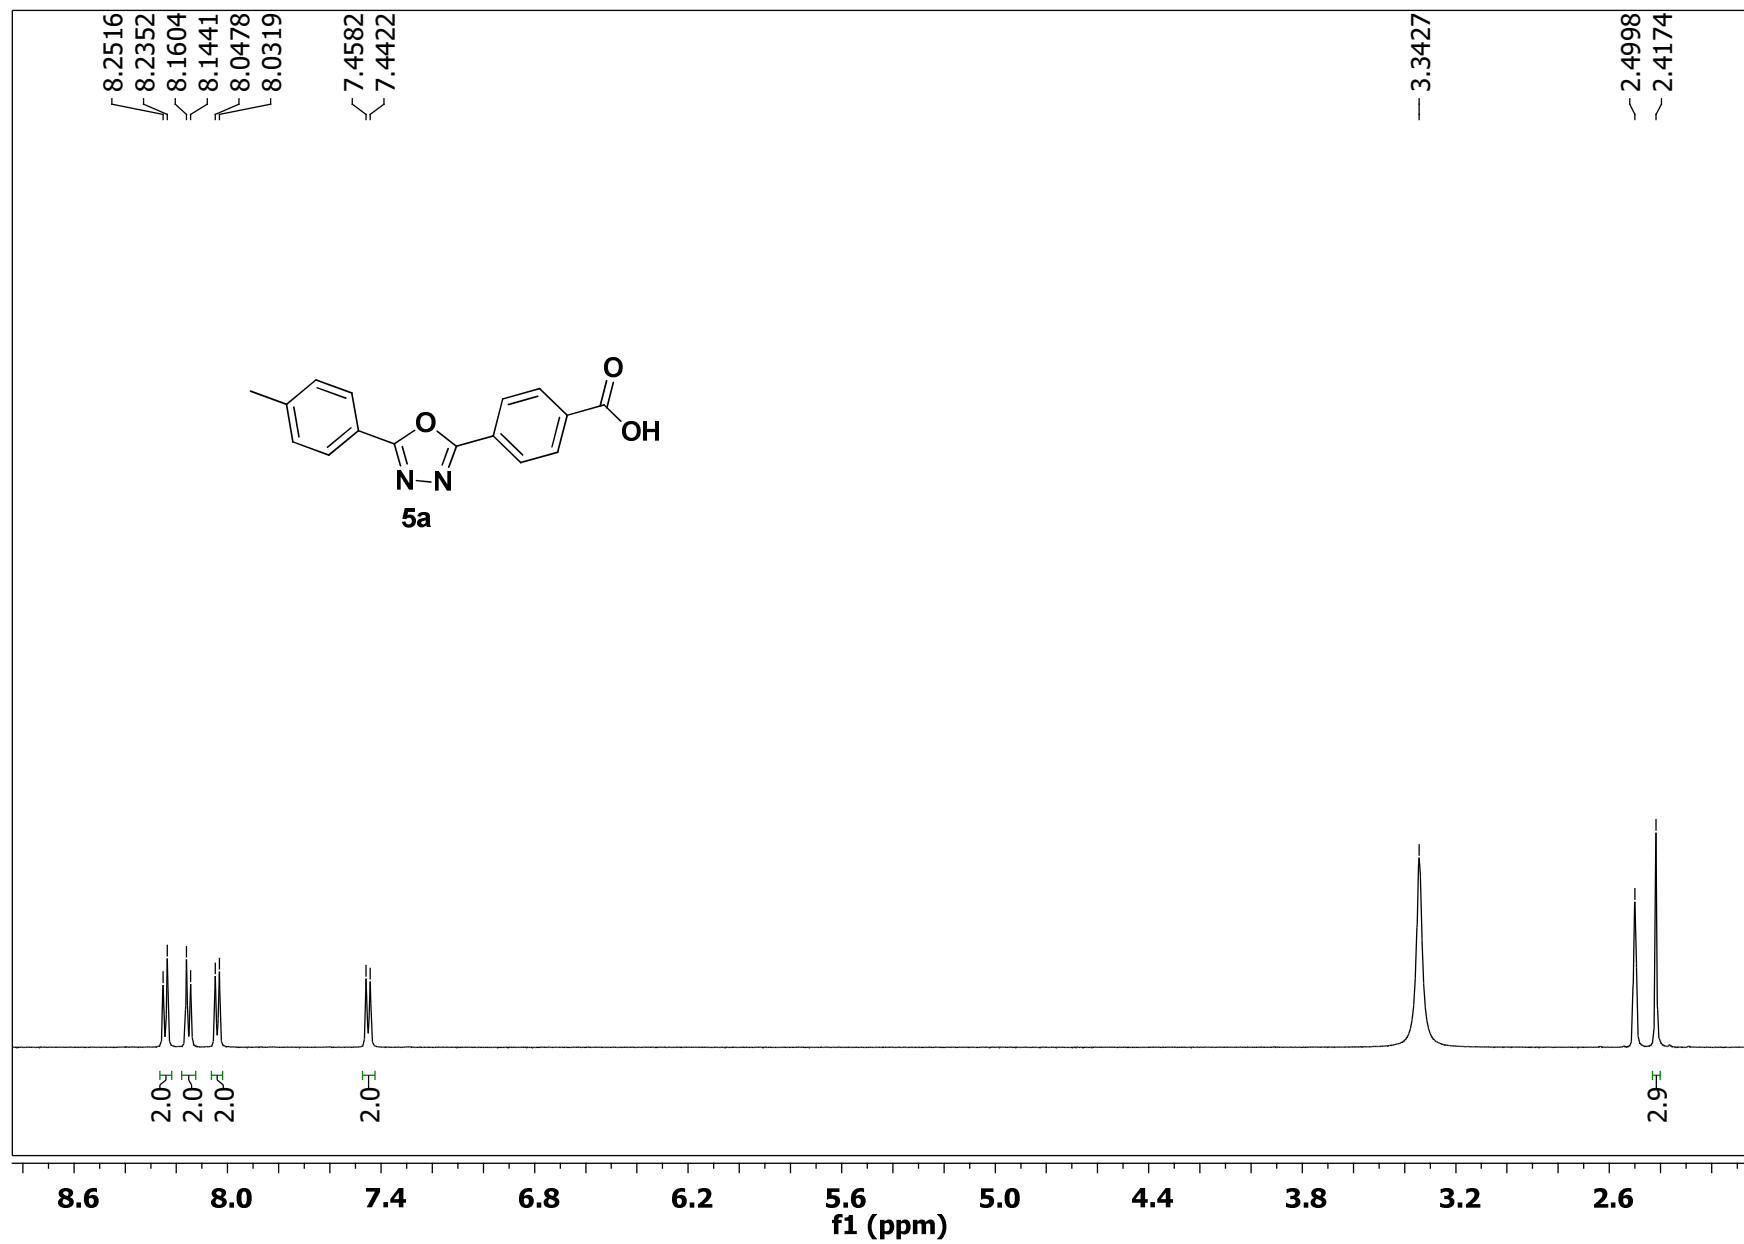

Figure S 16  $^{13}\text{C}$  NMR spectrum of compound 5a

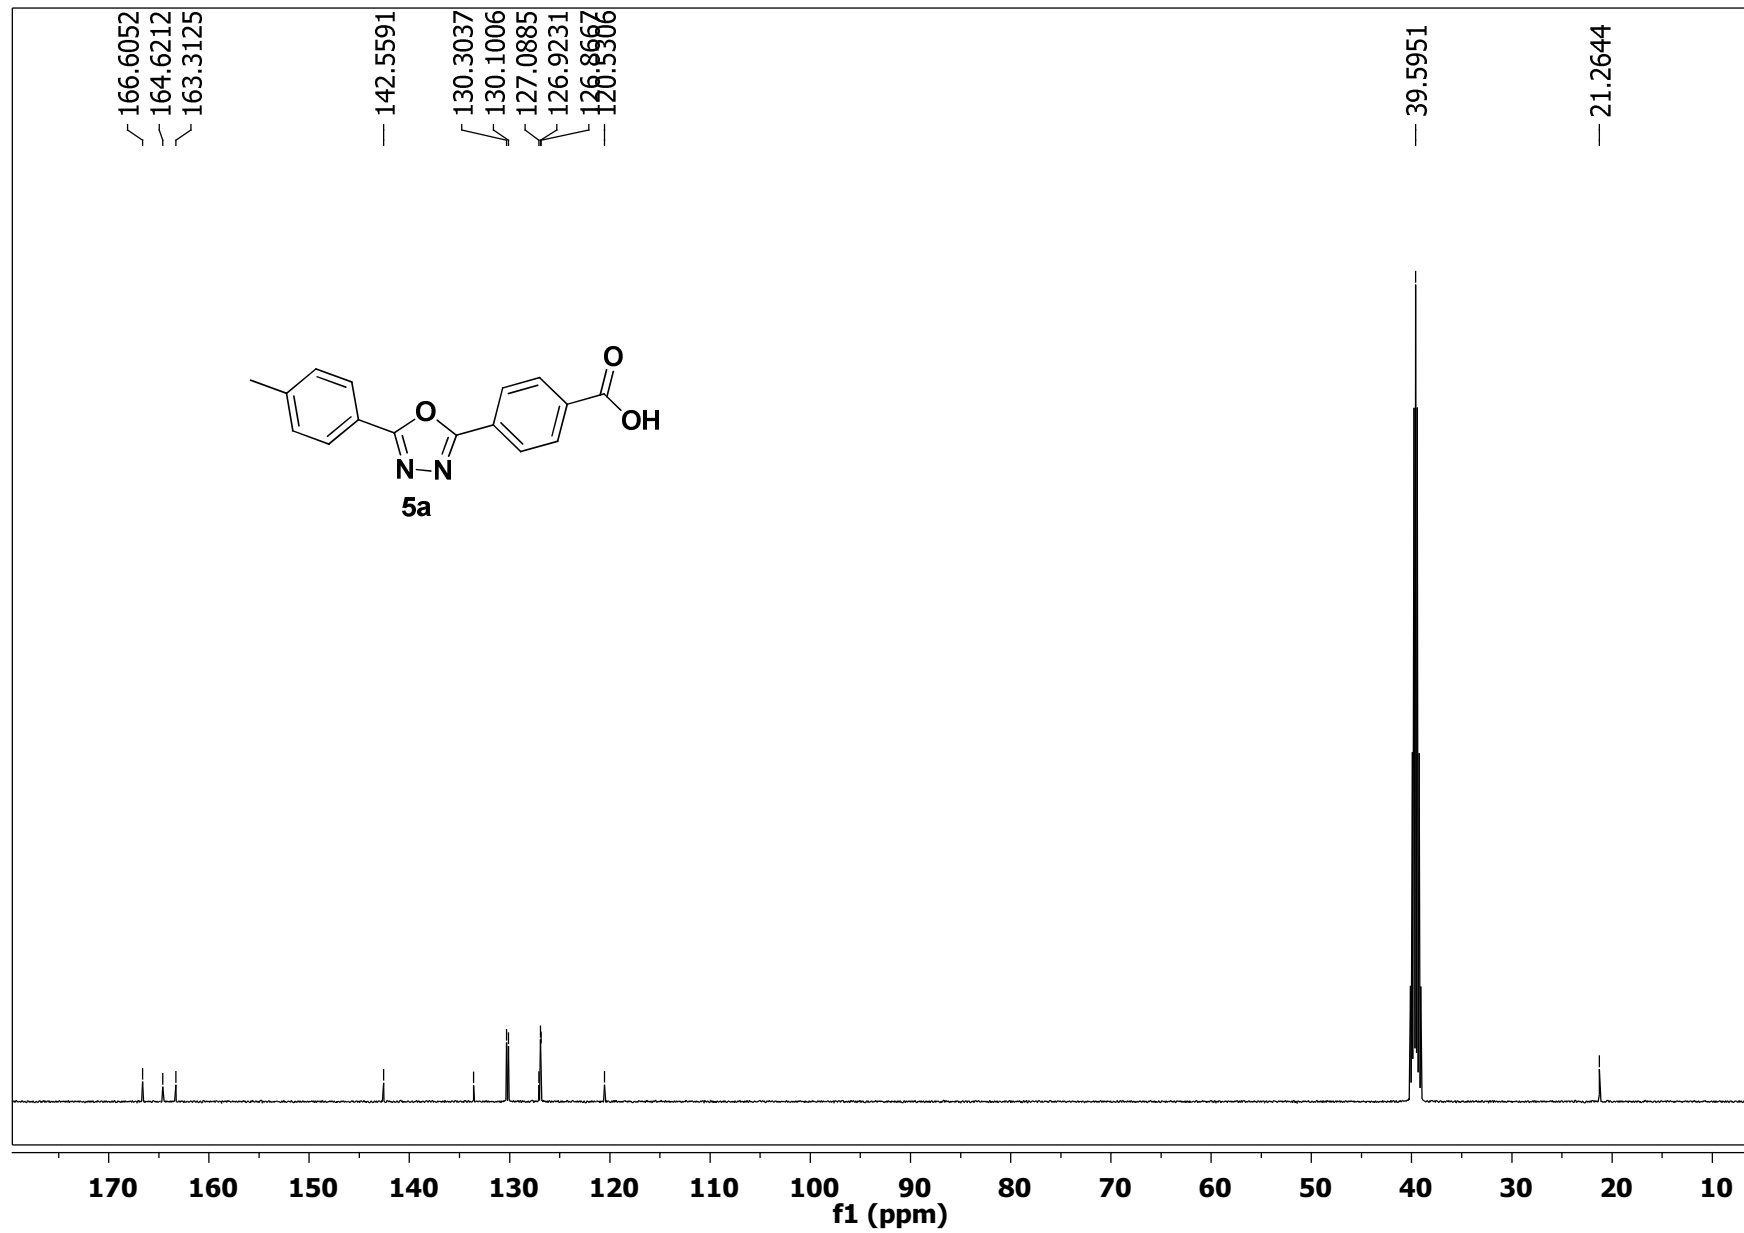



Figure S 17 <sup>1</sup>H NMR spectrum of compound 5b

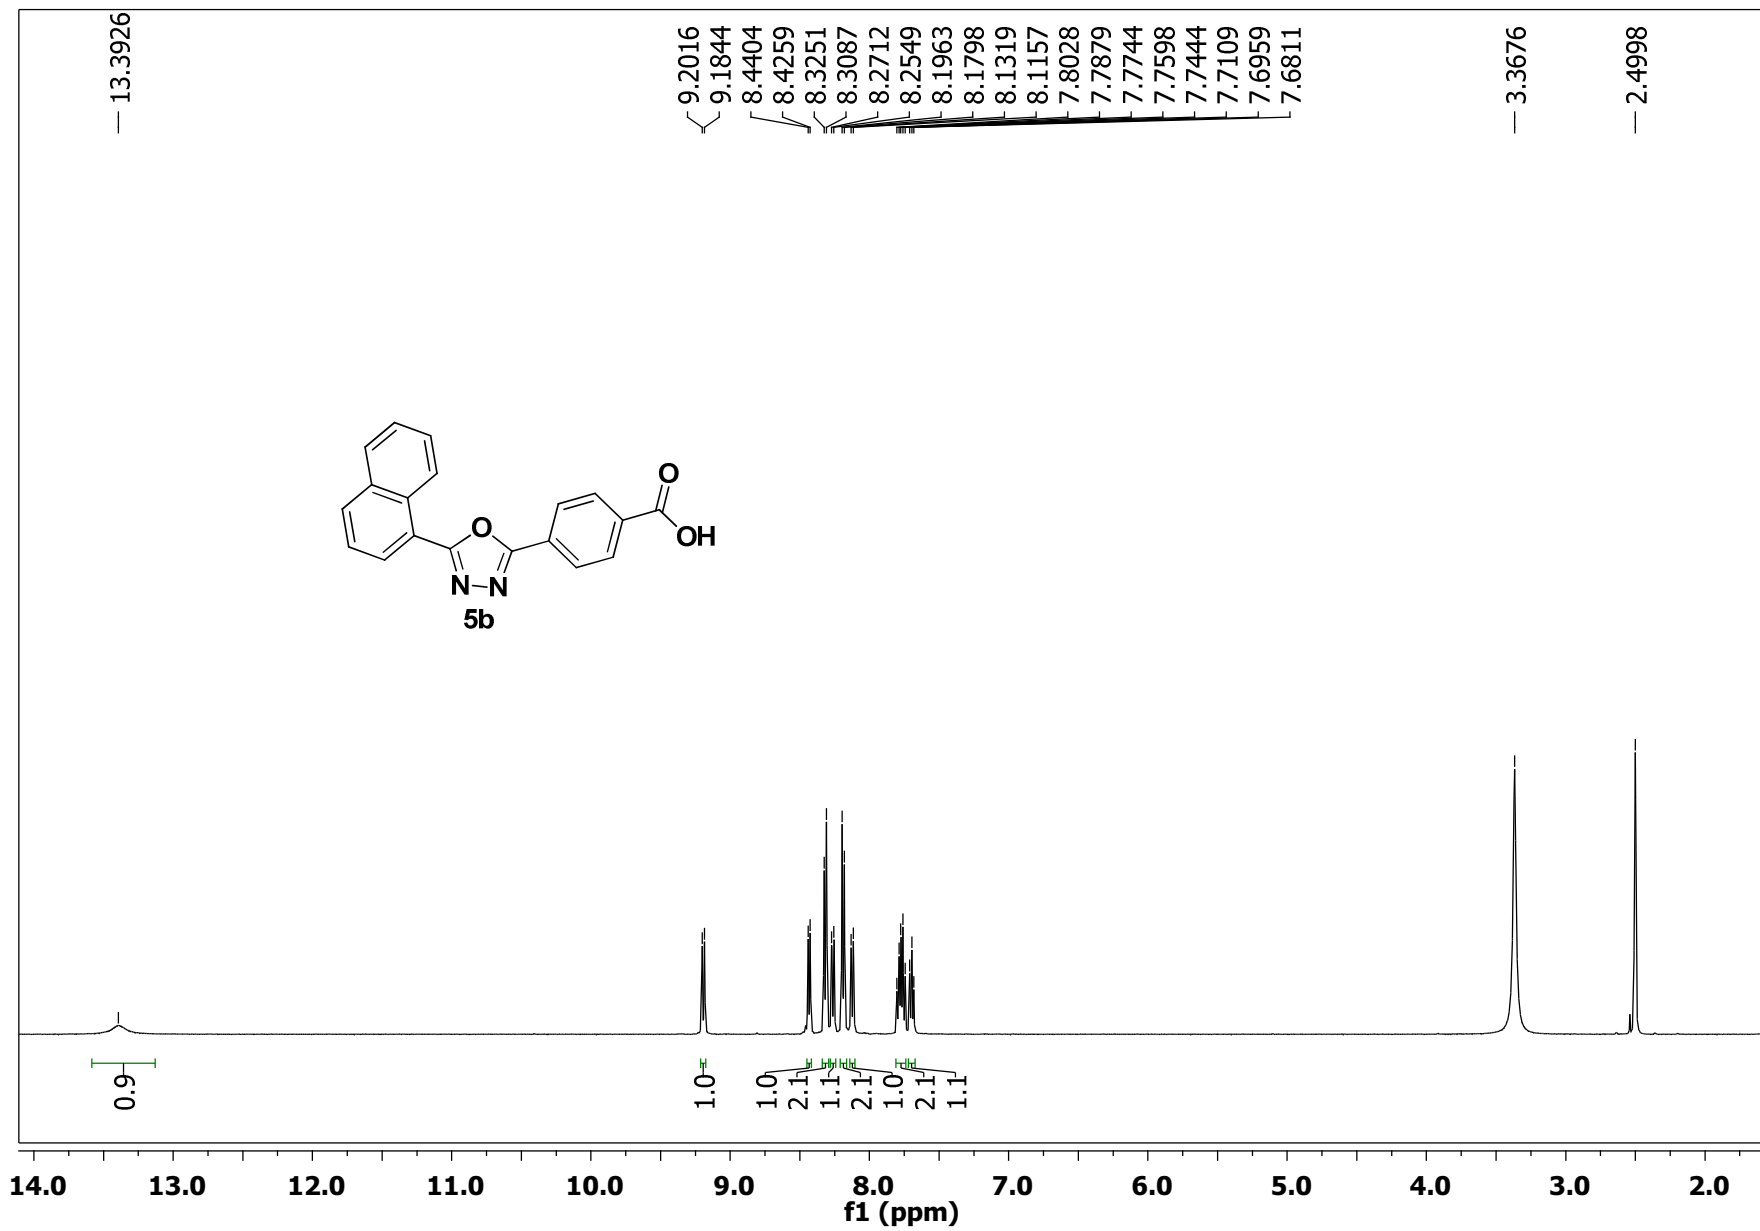

Figure S 18  $^{13}\text{C}$  NMR spectrum of compound 5b

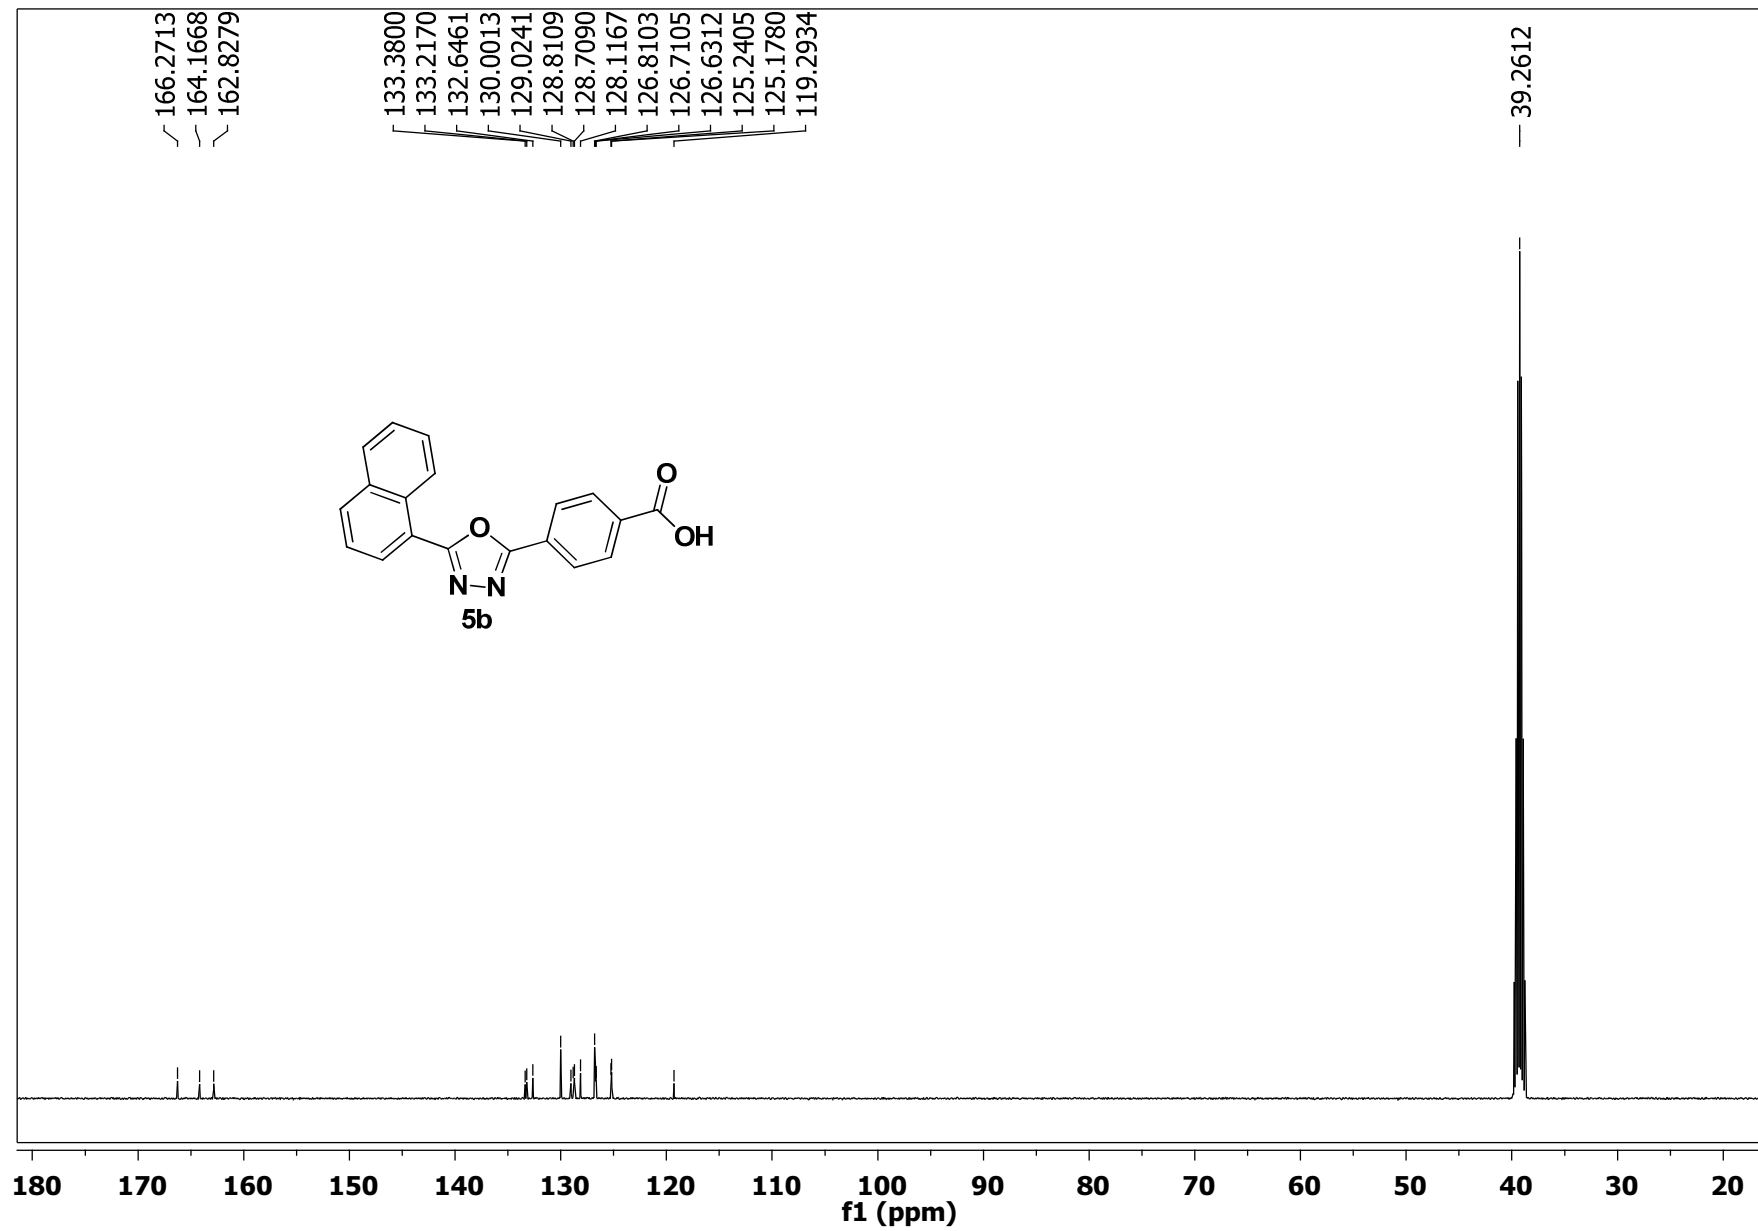

Figure S 19 <sup>1</sup>H NMR spectrum of compound 5c

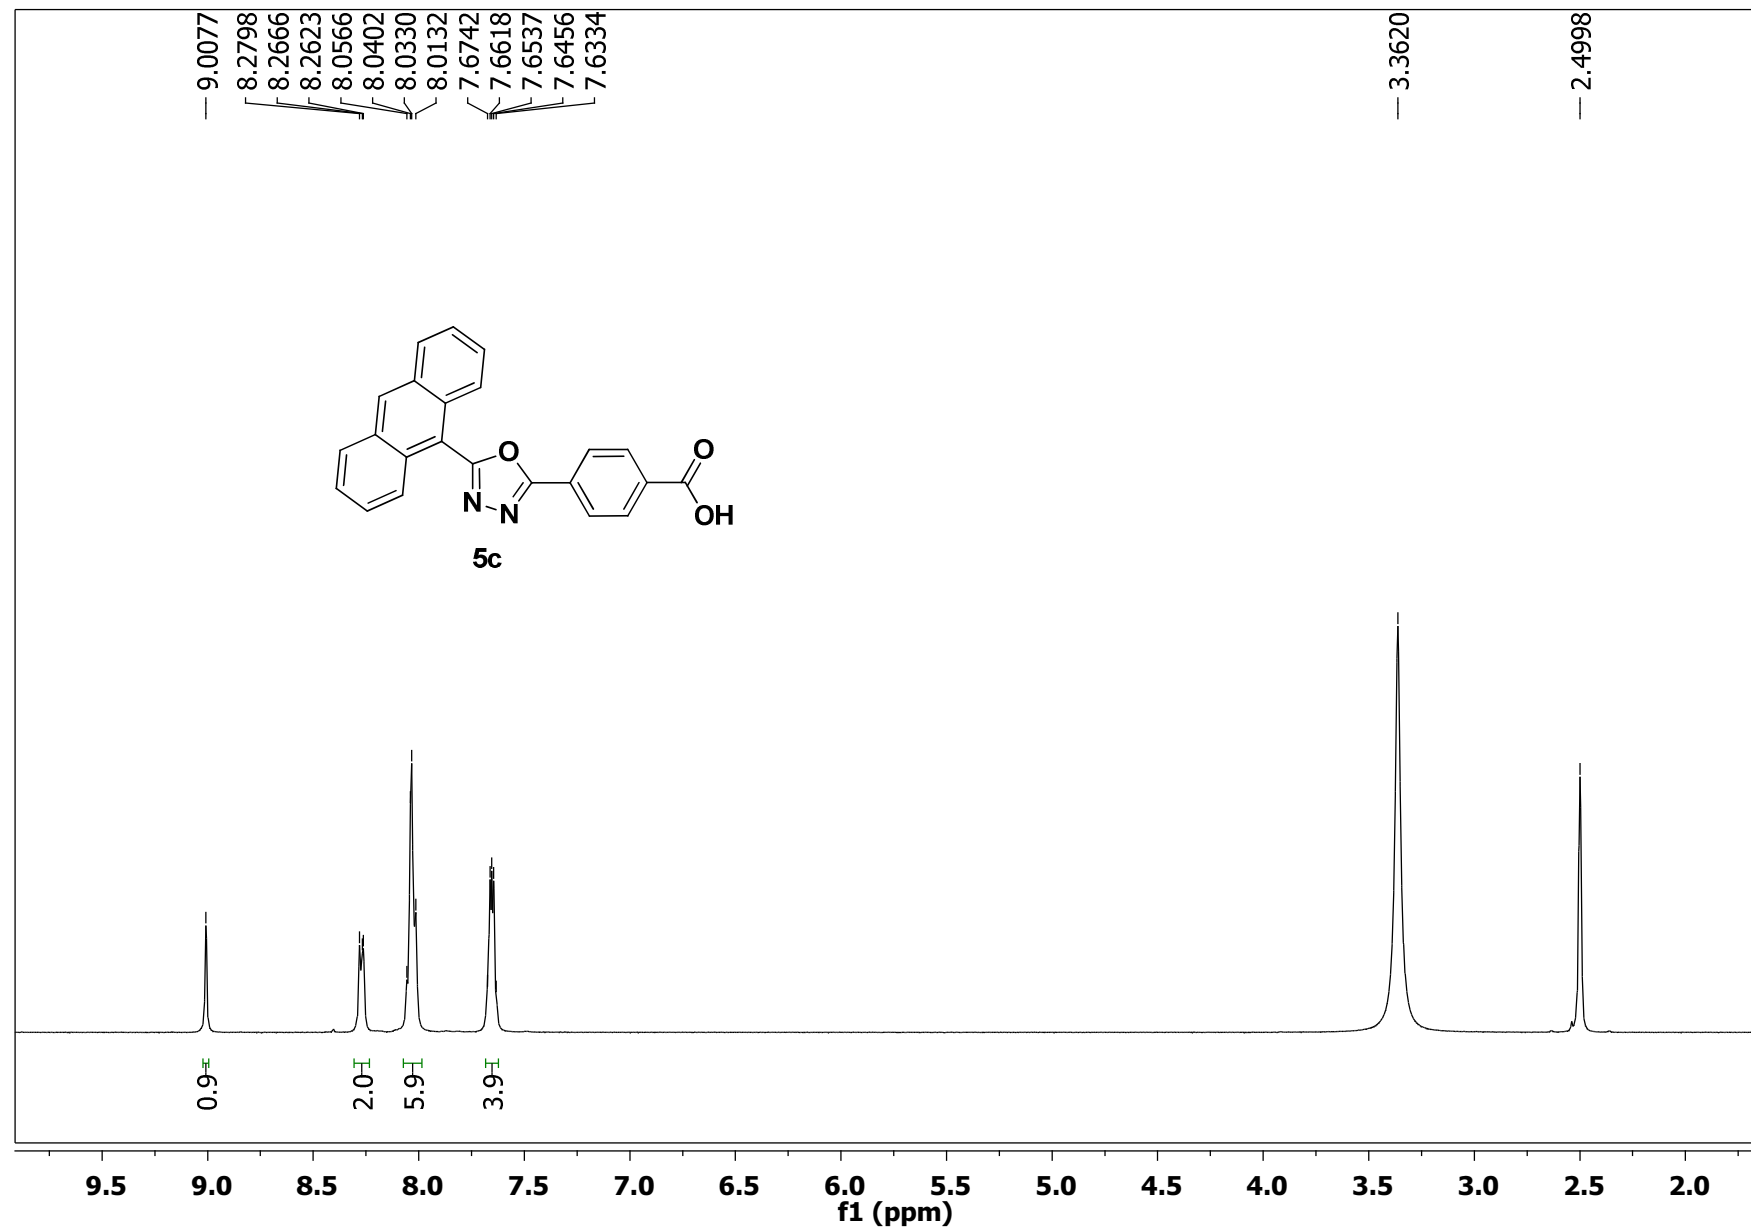

Figure S 20  $^{13}\text{C}$  NMR spectrum of compound 5c

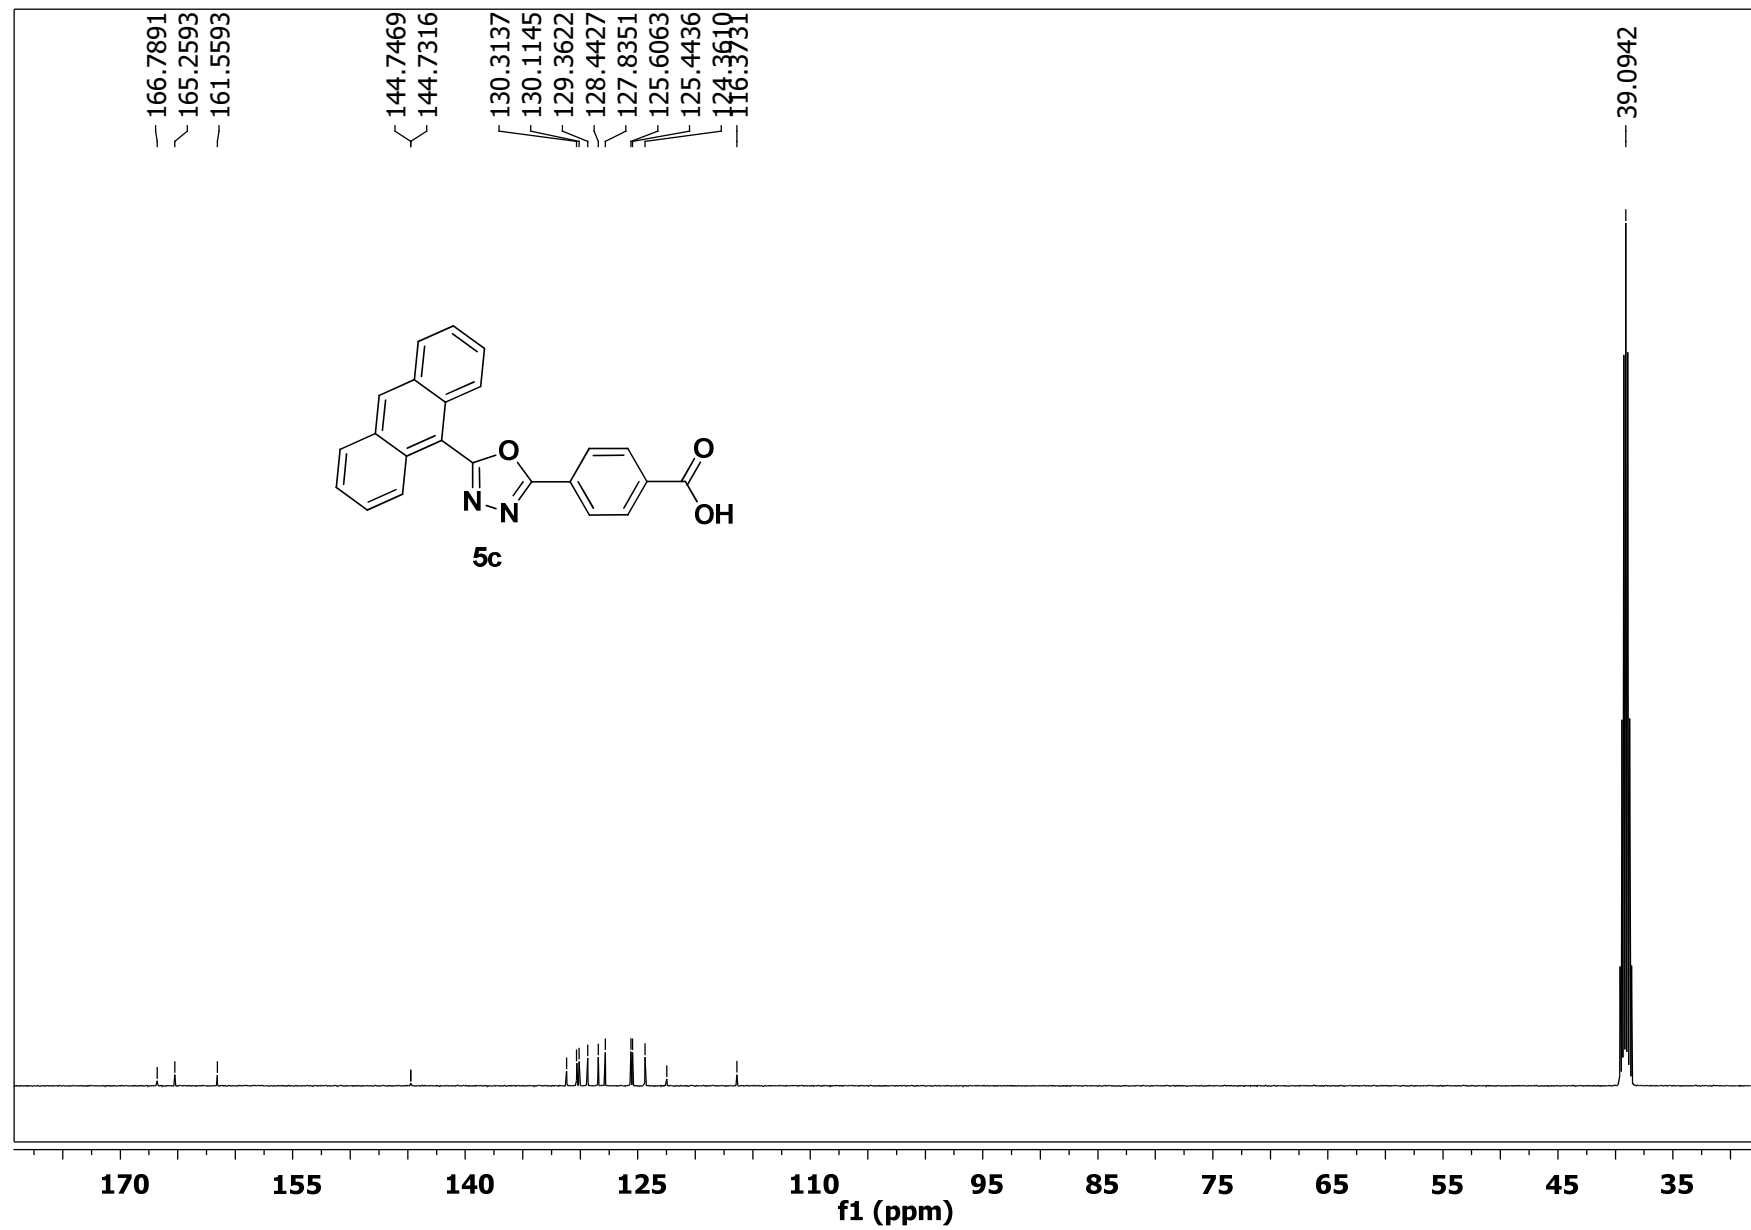

Figure S 21 <sup>1</sup>H NMR spectrum of compound 5d

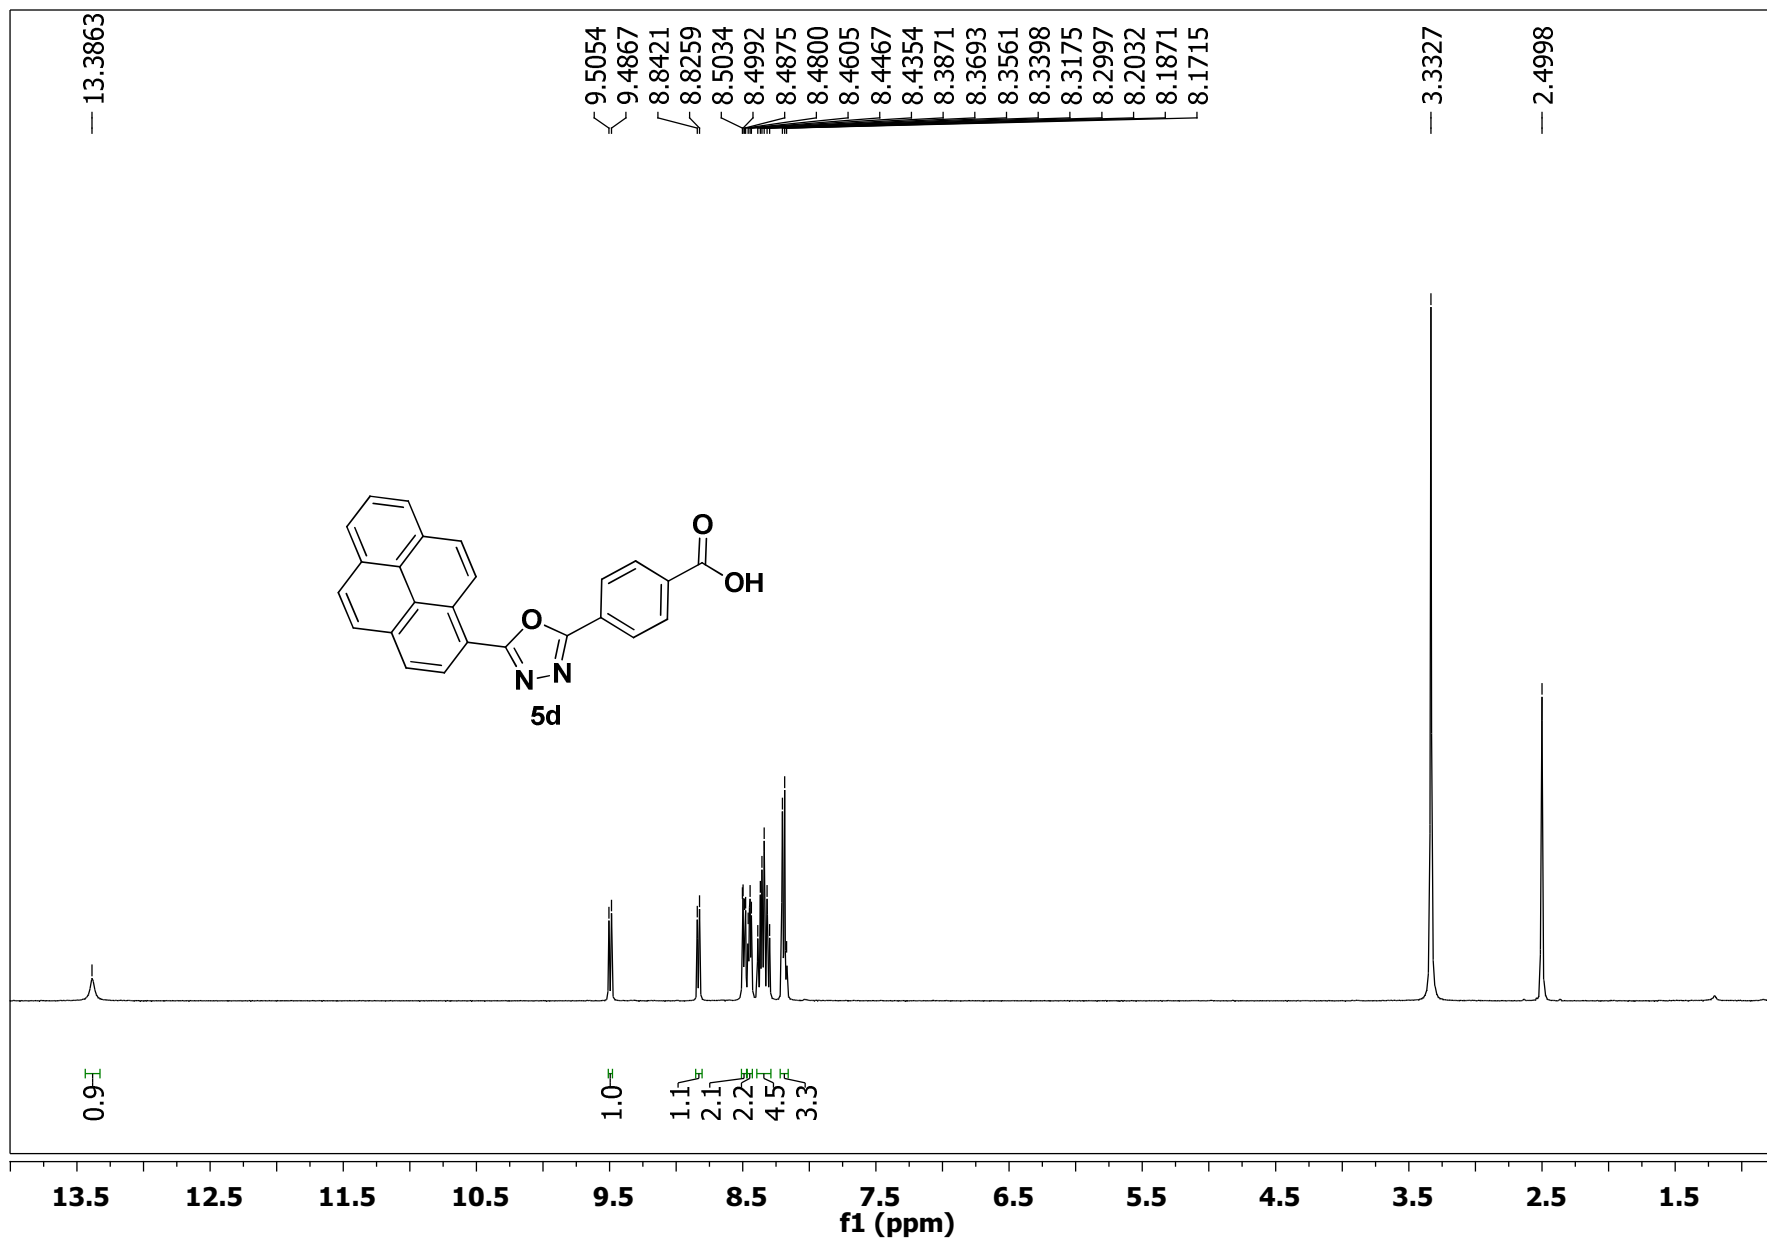

Figure S 22  $^{13}\text{C}$  NMR spectrum of compound 5d

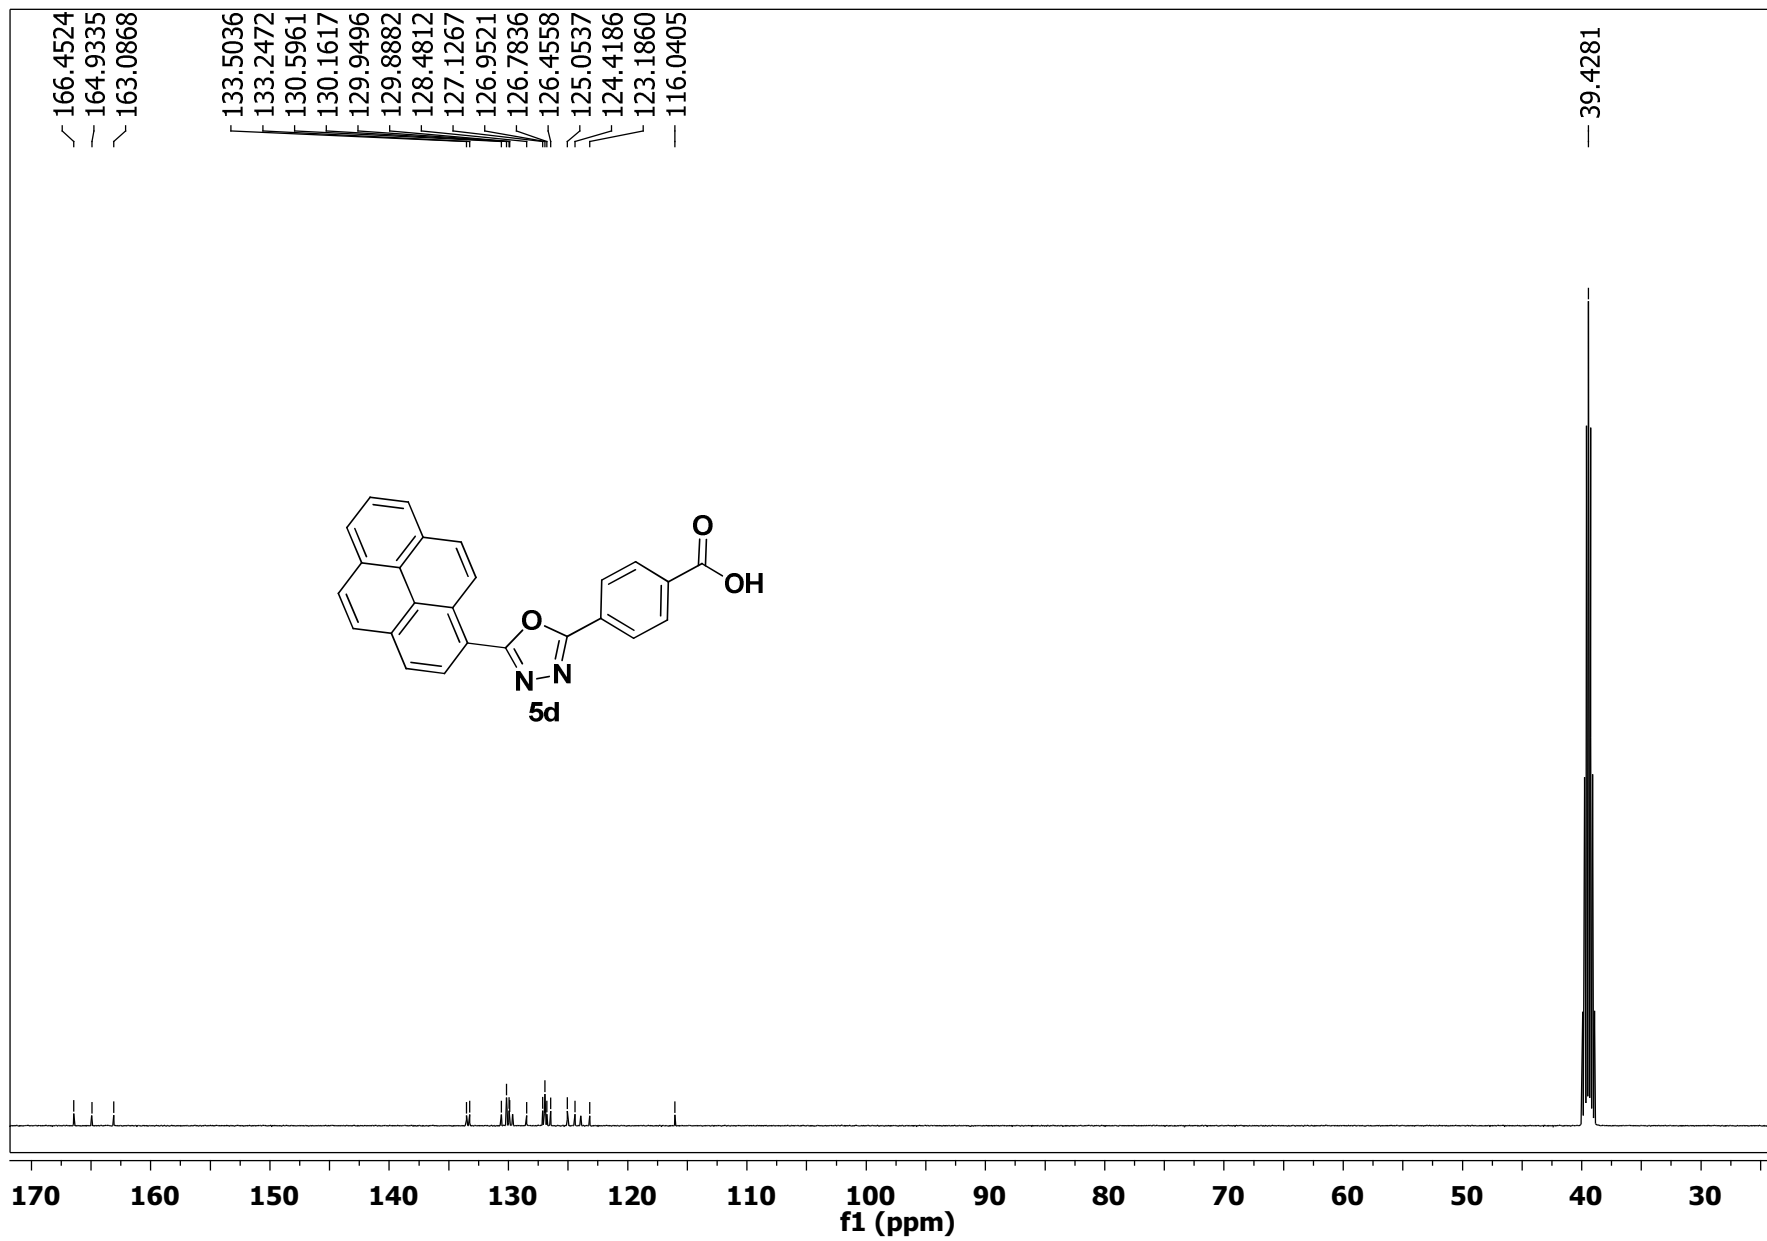

Figure S 23 <sup>1</sup>H NMR spectrum of compound 1a

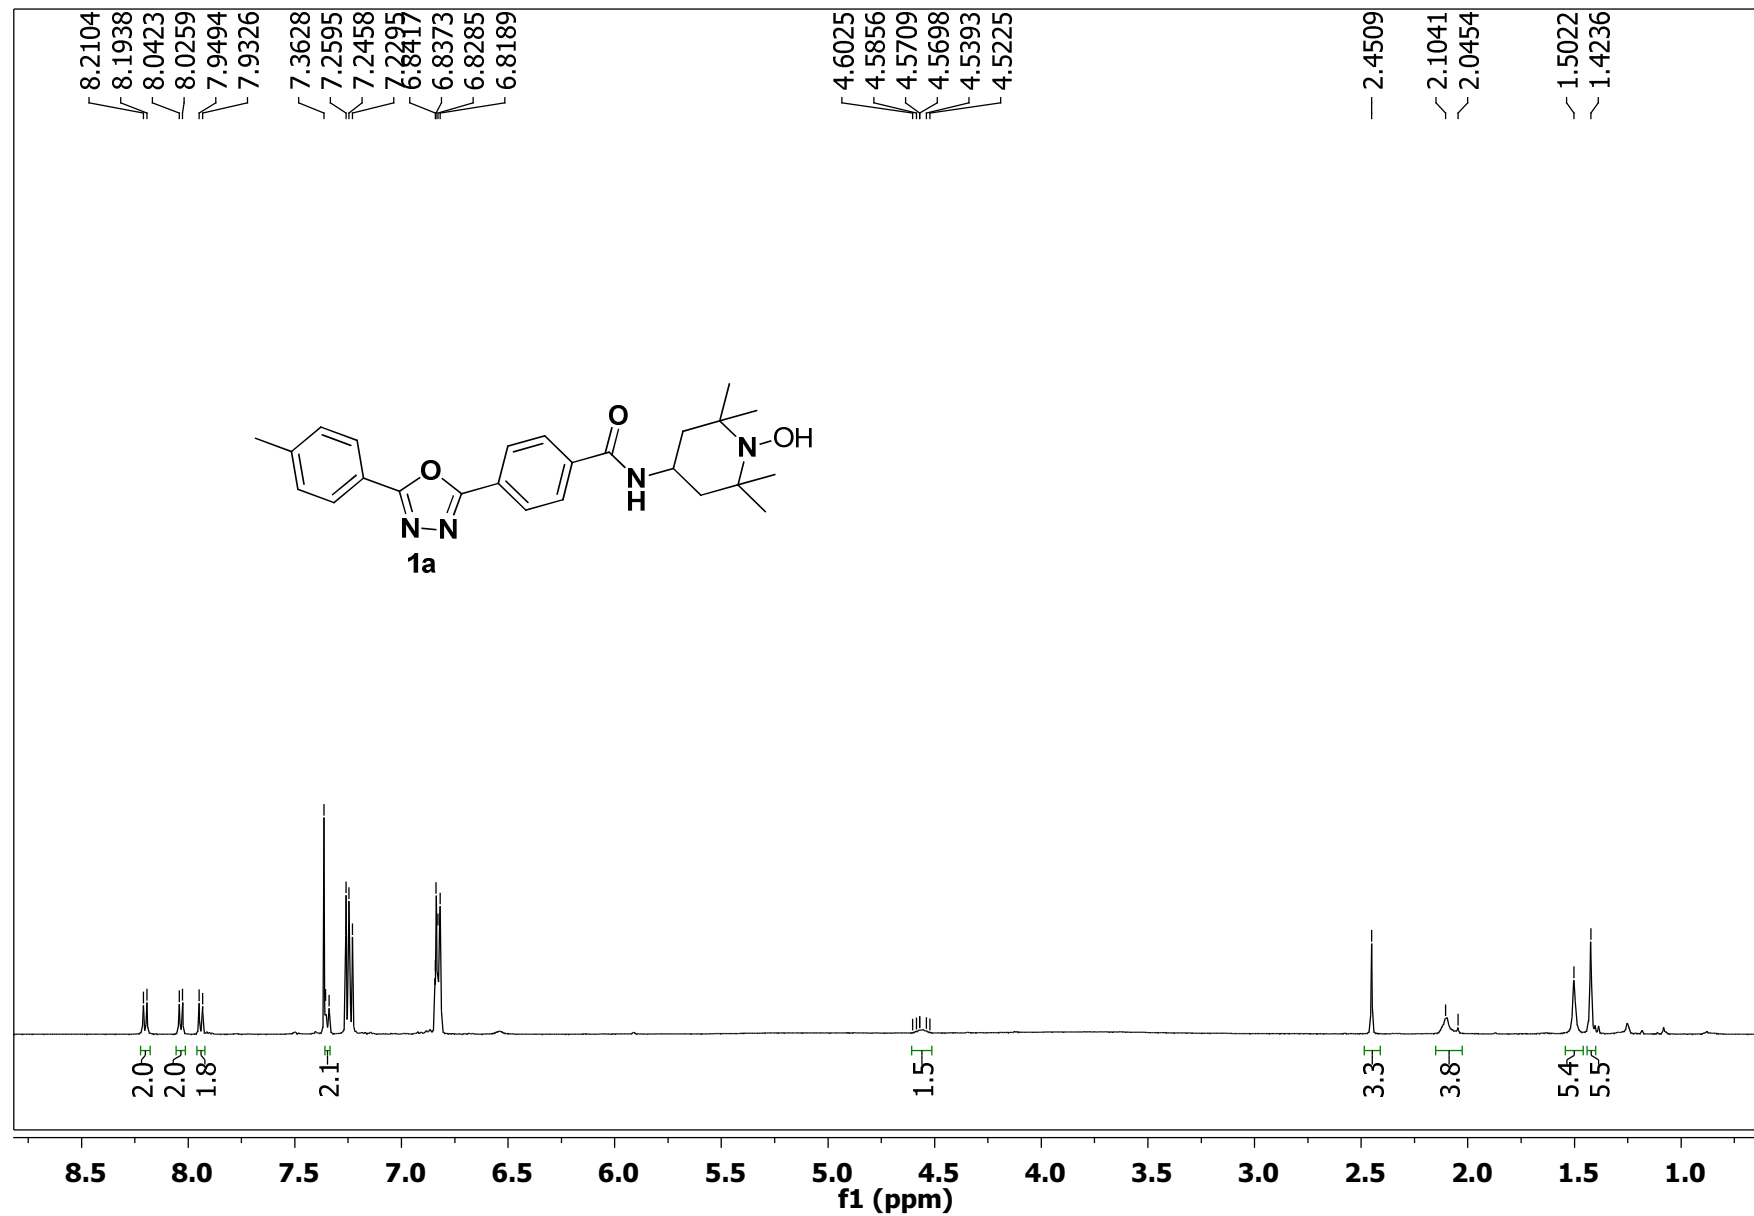

Figure S 24 <sup>1</sup>H NMR spectrum of compound 1b

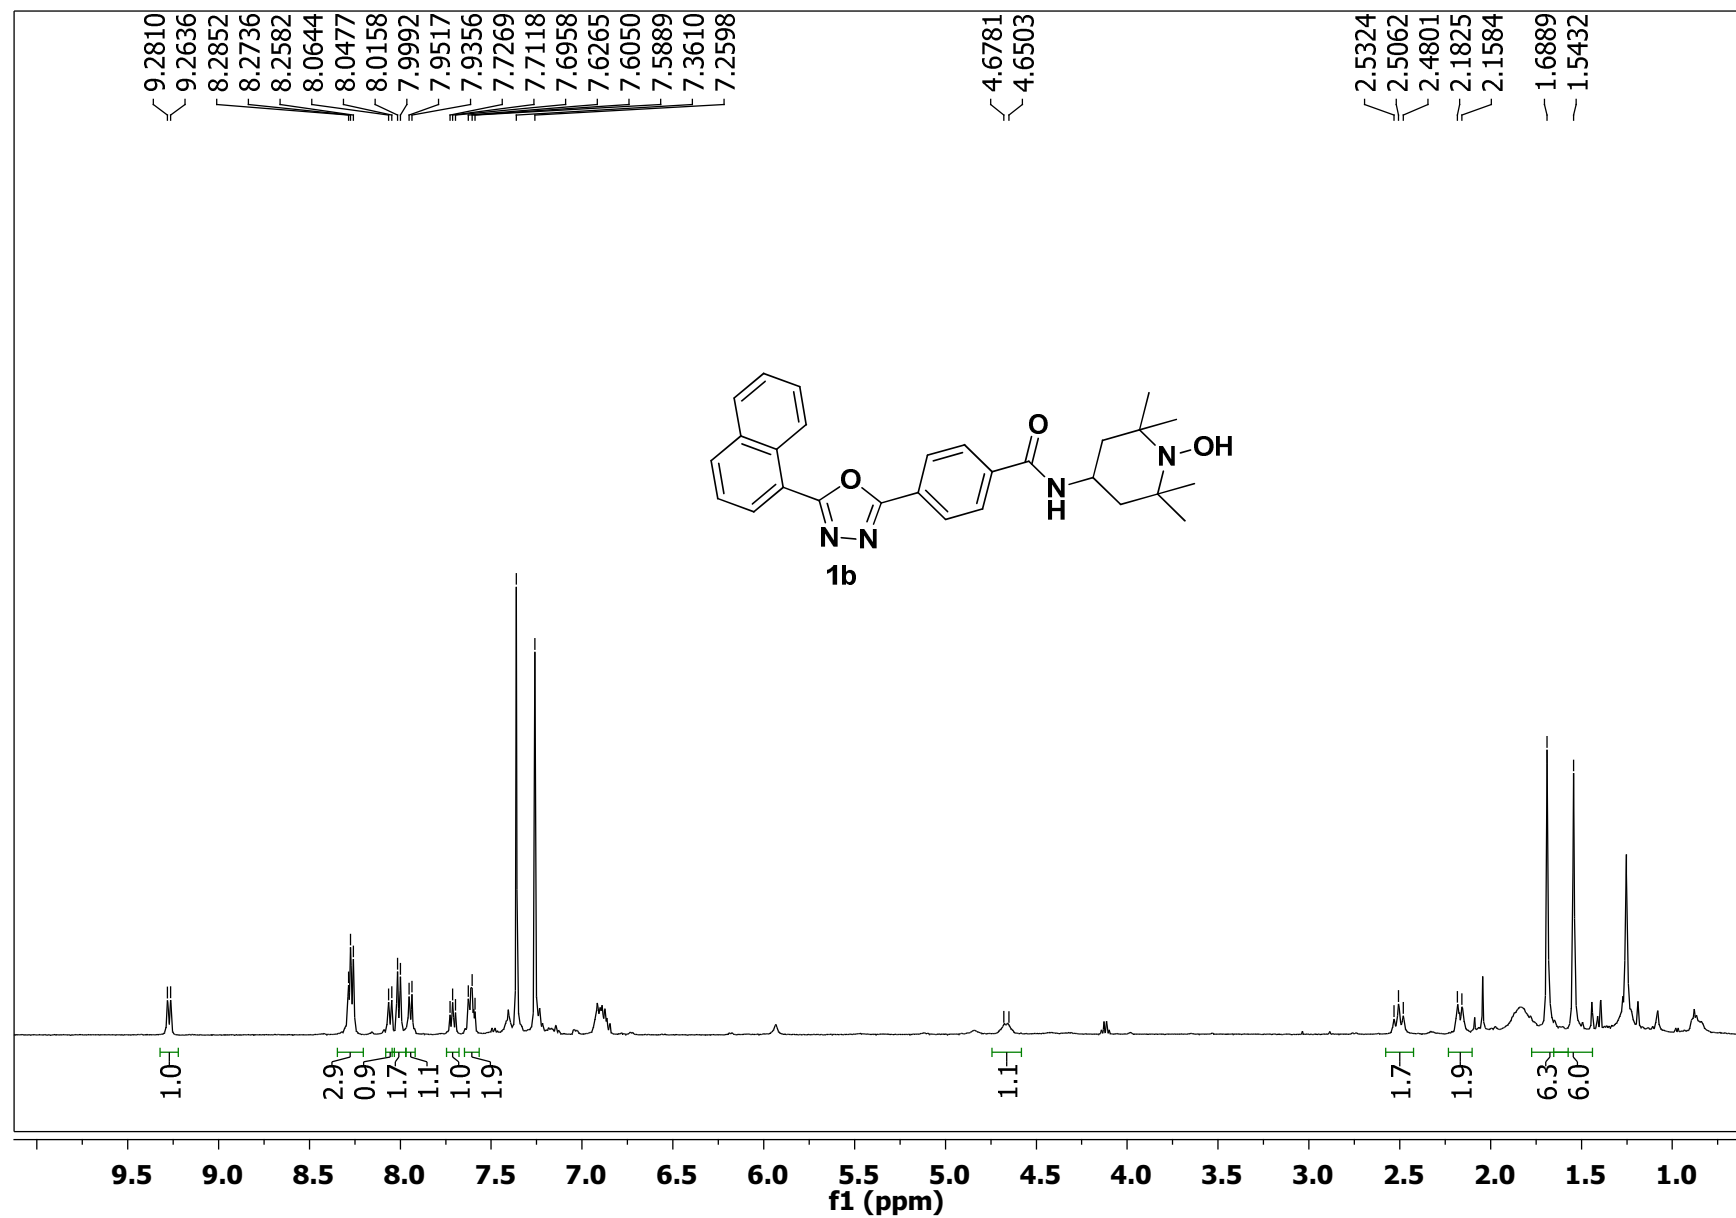



Figure S 25 <sup>1</sup>H NMR spectrum of compound 1c

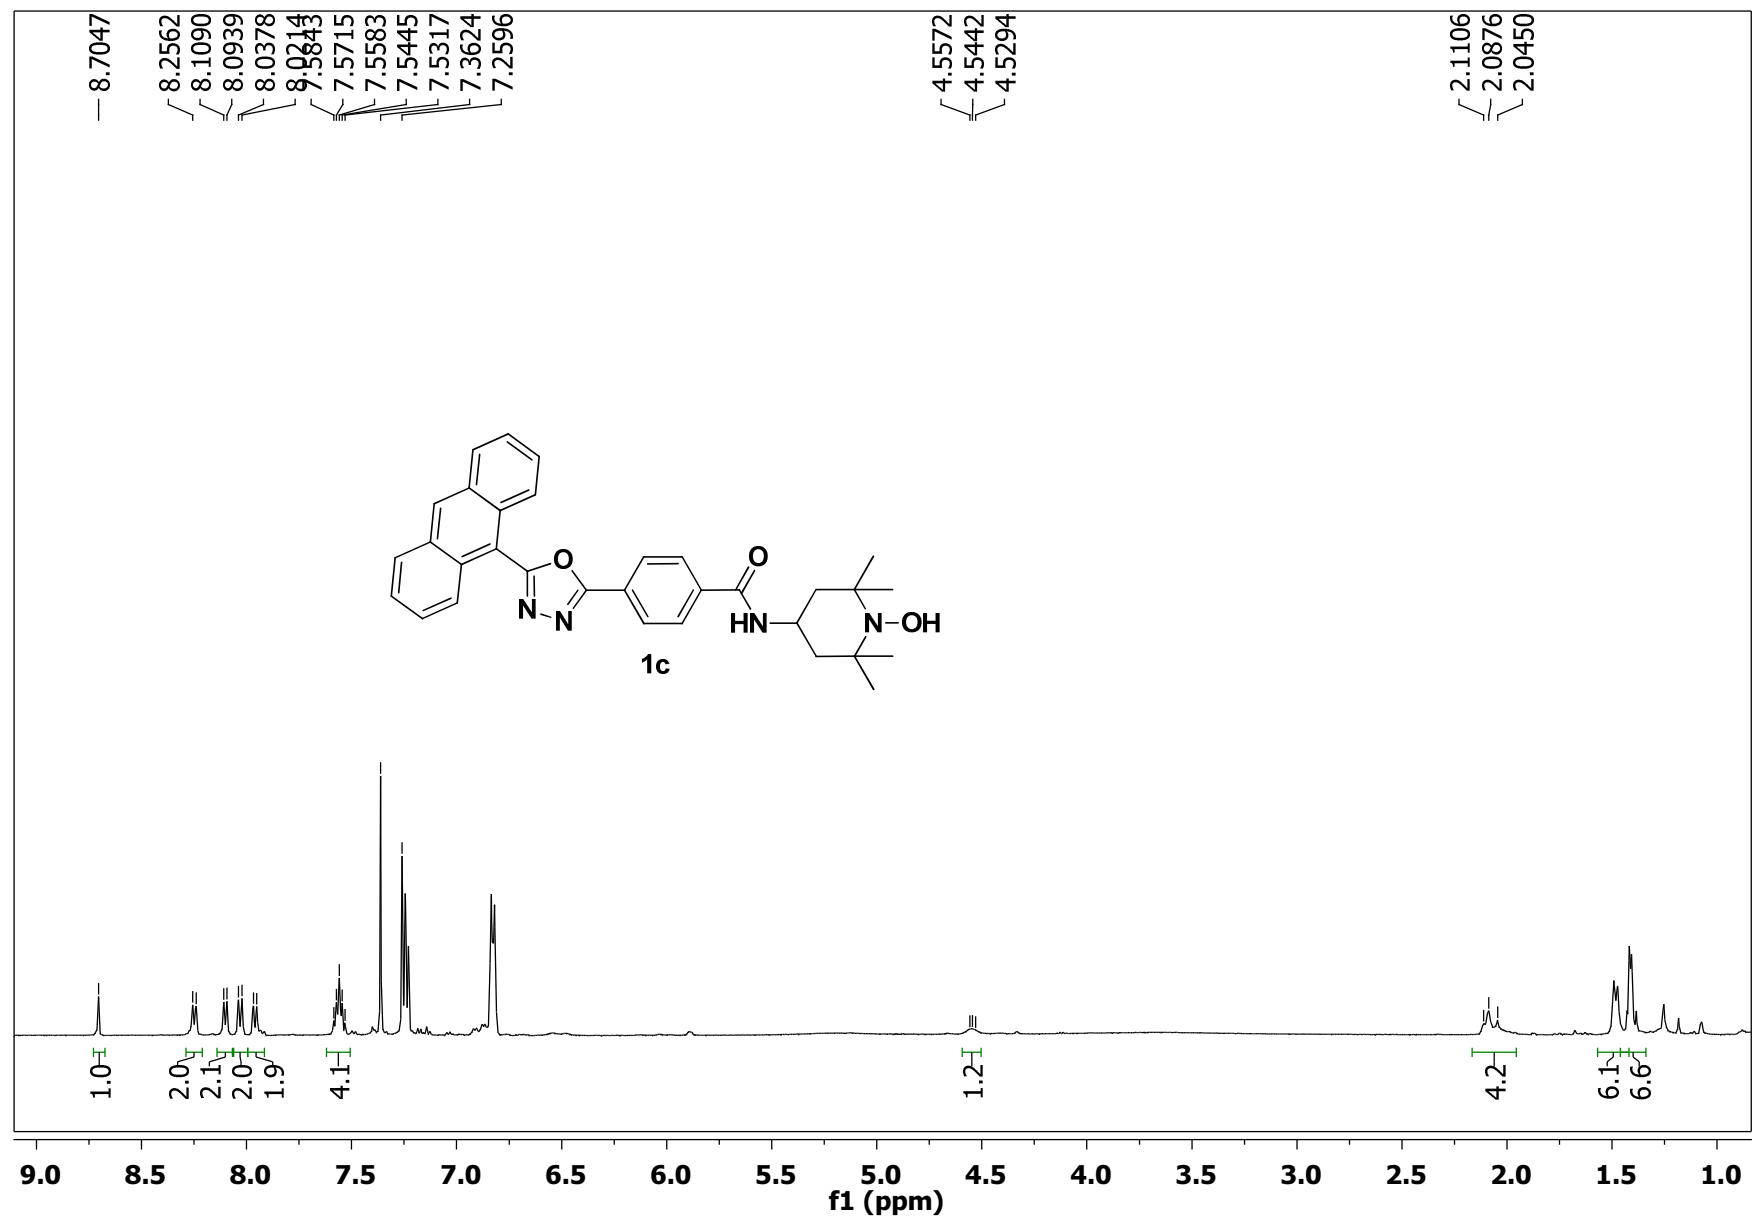

Figure S 26 <sup>1</sup>H NMR spectrum of compound 1d

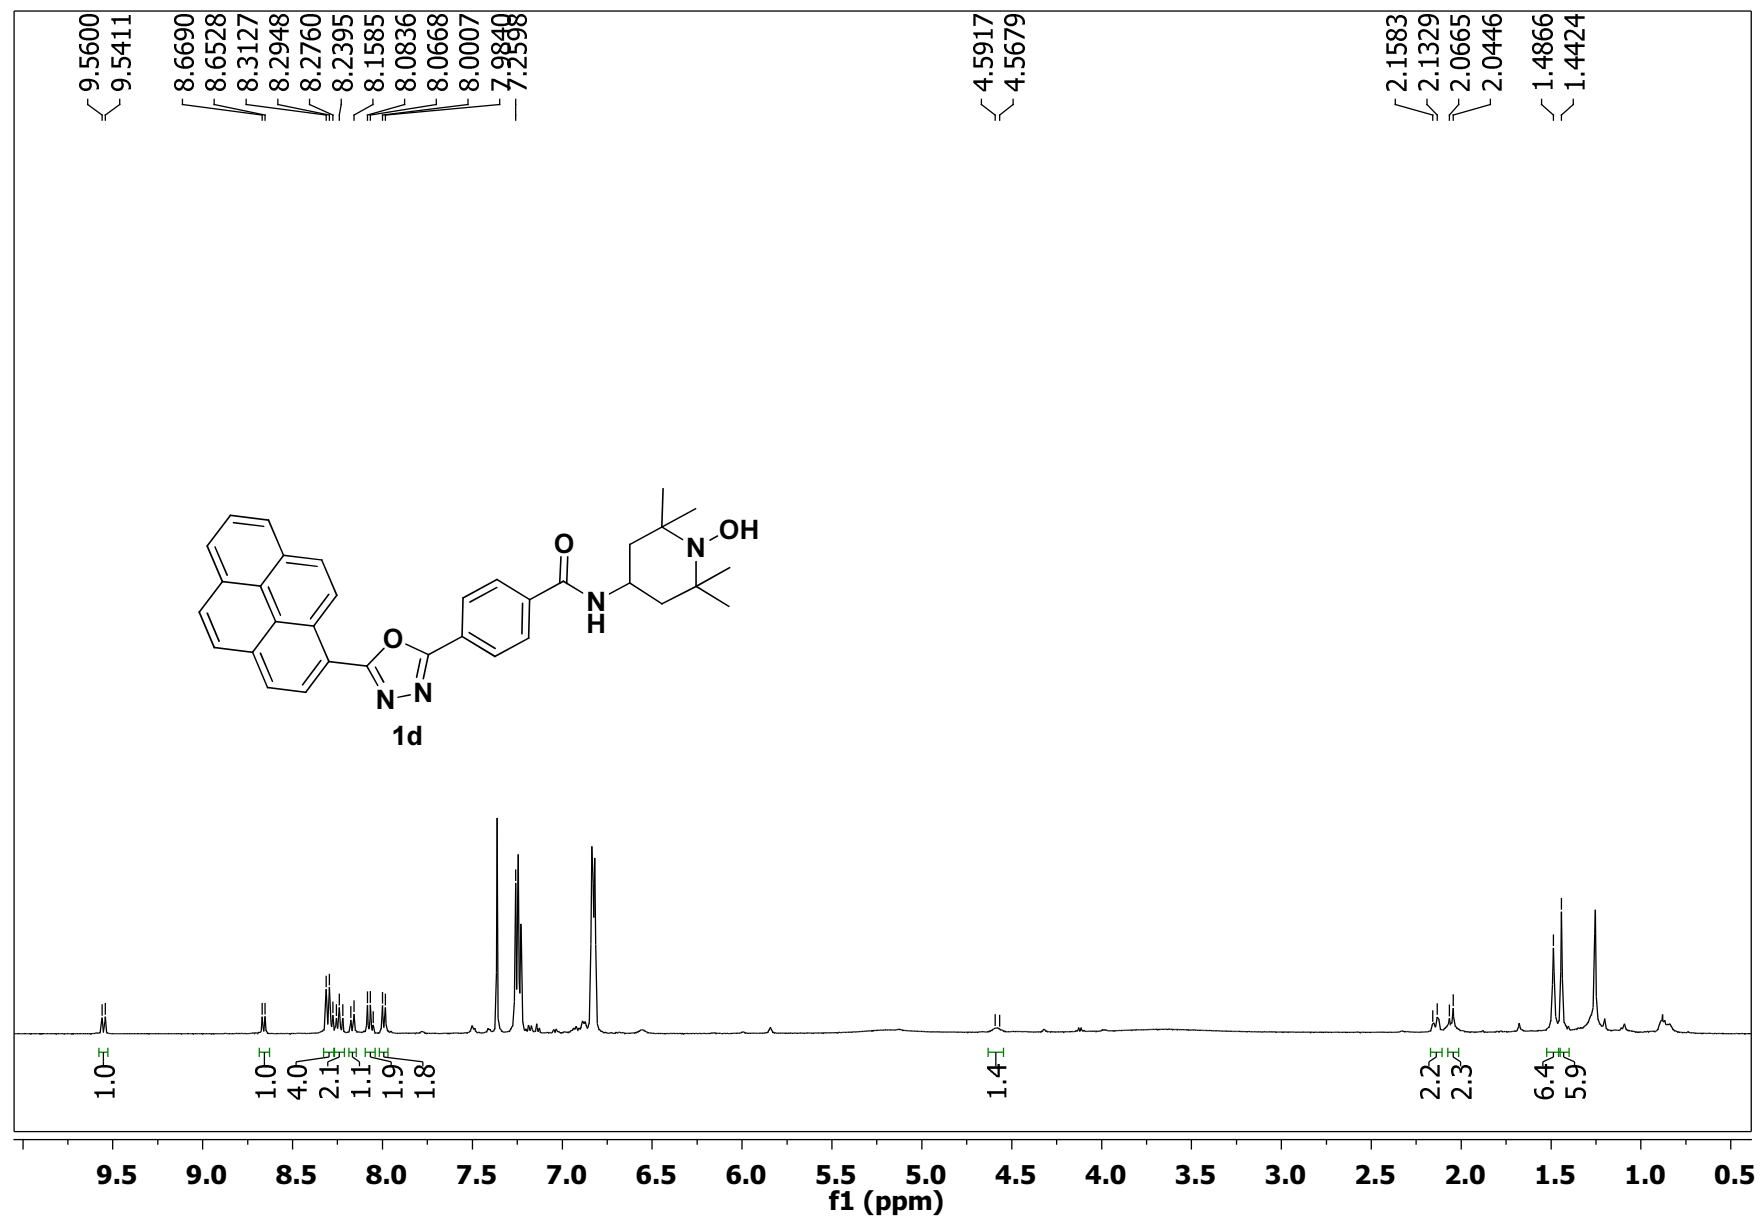

Supplement: c7nj01698k1.pdf [file c7nj01698k1.pdf]
